1 Title: Impact of Ferumoxytol Magnetic Resonance Imaging on the Rhesus Macaque Maternal-  
2 Fetal Interface

3

4 Running Title: Ferumoxytol MRI in Rhesus Macaque Pregnancy

5

6 Summary Sentence: Ferumoxytol magnetic resonance imaging for non-invasive pregnancy  
7 monitoring of the rhesus macaque does not impact histopathology or iron content of the  
8 maternal-fetal interface.

9

10 Keywords: ferumoxytol, imaging, iron nanoparticles, MRI, placenta, pregnancy, primates

11

12 Sydney M. NGUYEN<sup>1,2</sup>, Gregory J. WIEPZ<sup>1</sup>, Michele SCHOTZKO<sup>1</sup>, Heather A. SIMMONS<sup>1</sup>,  
13 Andres MEJIA<sup>1</sup>, Kai D. LUDWIG<sup>3</sup>, Ante ZHU<sup>4,5</sup>, Kevin BRUNNER<sup>1,6</sup>, Diego HERNANDO<sup>3,5</sup>,  
14 Scott B. REEDER<sup>3,4,5,6,7</sup>, Oliver WIEBEN<sup>3,5</sup>, Kevin JOHNSON<sup>3,5</sup>, Dinesh SHAH<sup>2</sup>, Thaddeus G.  
15 GOLOS<sup>1,2,8</sup>

16

17 <sup>1</sup>Wisconsin National Primate Research Center (WNPRC), Madison, Wisconsin, USA

18 <sup>2</sup>Obstetrics & Gynecology, University of Wisconsin Madison School of Medicine, Madison,  
19 Wisconsin, USA

20 <sup>3</sup>Medical Physics, University of Wisconsin Madison, Madison, Wisconsin, USA

21 <sup>4</sup>Biomedical Engineering, University of Wisconsin Madison, Madison, Wisconsin, USA

22 <sup>5</sup>Radiology, University of Wisconsin Madison, Madison, Wisconsin, USA

23 <sup>6</sup>Emergency Medicine, University of Wisconsin Madison, Madison, Wisconsin, USA

24 <sup>7</sup>Medicine, University of Wisconsin Madison, Madison, Wisconsin, USA

25 <sup>8</sup>Comparative Biosciences, University of Wisconsin Madison, Madison, Wisconsin, USA

26

27 Support: The National Institutes of Health (NIH) Grants U01HD087216 to D. Shah and O.

28 Wieben, University of Wisconsin Institute for Clinical and Translational Research (UW ICTR)

29 UL1 TR000427 (to M. Drezner), TL1 TR000429 (to KDL), UW Radiological Sciences Training

30 Grant T32 CA009206 (to KDL), K24 DK102595 (to SBR), R01 DK011651 (to SBR), R01

31 DK117354 (to DH), Endocrinology-Reproductive Physiology Training Grant T32 HD041921 (to

32 SMN), and P51 OD011106 (to the WNPRC).

33

34 **\*Correspondence to:** Thaddeus G. Golos, Ph.D., 1223 Capitol Ct., Madison, Wisconsin, USA

35 53715-1299. E-mail: [golos@primate.wisc.edu](mailto:golos@primate.wisc.edu)

36 **Abstract**

37 Ferumoxytol is a superparamagnetic iron oxide nanoparticle (SPION) used off-label as an  
38 intravascular magnetic resonance imaging (MRI) contrast agent. Additionally, ferumoxytol-  
39 uptake by macrophages facilitates detection of inflammatory sites by MRI through ferumoxytol-  
40 induced image contrast changes. Therefore, ferumoxytol-enhanced MRI holds great potential for  
41 assessing vascular function and inflammatory response, critical to determine placental health in  
42 pregnancy. This study sought to assess the fetoplacental unit and selected maternal tissues,  
43 pregnancy outcomes, and fetal well-being after ferumoxytol administration. In initial  
44 developmental studies, pregnant rhesus macaques were imaged with and without ferumoxytol  
45 administration. Pregnancies went to term with vaginal delivery and infants showed normal  
46 growth rates compared to control animals born the same year that did not undergo MRI. To  
47 determine the impact of ferumoxytol on the maternal-fetal interface, fetal well-being, and  
48 pregnancy outcome, four pregnant rhesus macaques at ~100 gd (gestational day) underwent MRI  
49 before and after ferumoxytol administration. Collection of the fetoplacental unit and selected  
50 maternal tissues was performed 3-4 days following ferumoxytol administration. A control group  
51 that did not receive ferumoxytol or MRI was used for comparison. Iron levels in fetal and  
52 maternal-fetal interface tissues did not vary between groups. There was no significant difference  
53 in tissue histopathology with or without exposure to ferumoxytol, and no effect on placental  
54 hormone secretion. Together, these results suggest that the use of ferumoxytol and MRI in  
55 pregnant rhesus macaques will not introduce a detectable risk to the mother or fetus at the time  
56 of imaging or up to one year following normal vaginal delivery.

57 **Introduction**

58           In the hemochorial human and nonhuman primate placenta, maternal intervillous blood  
59 bathes the placental villi, allowing oxygen and nutrient transfer to the fetal blood circulating  
60 within the capillaries of the villous stroma. Pregnancy complications may stem from  
61 maladaptation of maternal vessels causing insufficient placental perfusion, leading to  
62 macrophage recruitment, cytokine release, and hypoxia at the maternal-fetal interface (MFI).  
63 Compromised intervillous flow is associated with adverse pregnancy outcomes [1-4]: insufficient  
64 placental perfusion could result in fetal growth restriction, preeclampsia, and pregnancy loss.  
65 The ability to identify abnormal uteroplacental vascular adaptation, compromised perfusion, and  
66 attendant inflammation could be valuable in identifying at-risk pregnancies before clinical  
67 manifestations.

68           Currently, ultrasound is the most commonly used method to assess fetal growth. It is also  
69 used to detect umbilical and uteroplacental blood flow abnormalities, but only indirectly through  
70 velocity waveform analysis. Further, ultrasound lacks the ability to detect immune cell homing to  
71 the MFI that may precede adverse pregnancy outcomes. Magnetic resonance imaging (MRI) can  
72 provide high-resolution anatomic and functional information including blood velocities and flow,  
73 perfusion, and oxygenation to characterize placental implantation site, visualize maternal pelvic  
74 structures, and diagnose abnormally aggressive trophoblast invasion or placental abruption [5].  
75 In many clinical applications, gadolinium-based contrast agents (GBCAs) are used to quantify  
76 tissue perfusion and perform high-resolution angiography [6]. In the non-human primate,  
77 gadolinium MRI has been used to investigate spiral artery and perfusion domain (cotyledon)  
78 location, and quantify placental perfusion [7,8], the latter of which has also been achieved in  
79 humans [9]. However, GBCAs have been shown to cross the placenta into the fetus with

80 uncertainty in the long-term consequences of in utero GBCA exposure. Although there is no  
81 specific evidence that it causes teratogenic or chromosomal damage [5,10-12], the risk to the  
82 fetus of gadolinium based MR contrast agent administration remains unknown and should not be  
83 routinely provided to pregnant patients [13].

84         We explored an alternative approach for quantitative tissue perfusion and MR  
85 angiography in pregnancy, using the SPION ferumoxytol as a contrast agent. Ferumoxytol is  
86 approved for the treatment of iron deficiency in adults, including pregnant women. It has also  
87 emerged as an off-label MR contrast agent with favorable MR properties [14,15] that can yield  
88 high-detail angiography and functional information about the MFI non-invasively, including  
89 quantitative perfusion maps of maternal blood that allow for analysis of individual cotyledons in  
90 the placenta [16], as seen in imaging with gadolinium [7]. As such, it has high potential to  
91 identify local and global perfusion abnormalities that might be indicative of placenta  
92 pathologies..Our initial MR imaging results suggest that ferumoxytol stays within the maternal  
93 blood and does not cross the placenta into the fetal circulation immediately after ferumoxytol  
94 administration [17]. Ferumoxytol also has the potential to spatially localize inflammatory events,  
95 as the nanoparticles are taken up by activated cells of the mononuclear phagocyte system at sites  
96 of tissue inflammation, which can then be imaged after ferumoxytol in the blood space has  
97 cleared [14,18-22]. The MRI transverse relaxation rate  $R2^*$  has a known linear relationship with  
98 the concentration of iron in tissues. Therefore,  $R2^*$  mapping may enable localization of iron-  
99 laden macrophages, as well as quantification of their density.

100         Ferumoxytol has been previously used in, but is not limited to, the study of inflammation  
101 of the pancreas in patients with type-1 diabetes [22], inflammation of the lymph nodes in patients  
102 with Hodgkin lymphoma [18,21], inflammation in patients with osteomyelitis and arthritis, the

103 study of normal adrenal function, monitoring of kidney transplant vessel patency, monitoring  
104 intracranial aneurysms for potential rupture, and in the tracking of stem cell grafts. Application  
105 of ferumoxytol use to the MFI may be extremely valuable for the monitoring of placental  
106 dysfunction. Ferumoxytol is routinely used to treat anemia in pregnant mothers. Its safety profile  
107 and properties for MR imaging makes it a promising contrast agent to fill a gap in the non-  
108 invasive diagnosis of placental health with potential for clinical routine use. Importantly,  
109 demonstrating the safe use of ferumoxytol for placental imaging is a necessary step in this  
110 application. Therefore, the purpose of this work is to assess the feasibility of ferumoxytol  
111 administration on the MFI, fetal well-being, and pregnancy outcomes in a non-human primate  
112 model. The rhesus macaque provides an accurate experimental model of the human MFI and  
113 immune system, having hemochorial placentation, endovascular trophoblast invasion with  
114 attendant spiral artery remodeling, and chorionic villous placental architecture. We observed no  
115 negative impact from ferumoxytol injection on the histopathology at the MFI, or evidence of  
116 ferumoxytol transfer to the fetus, as assessed by iron content in MFI and fetal tissues These  
117 results demonstrate the feasible infusion of ferumoxytol in a cohort of pregnant rhesus macaques.  
118 Future work will utilize this instructive animal model with ferumoxytol-enhanced MRI to  
119 challenge experimental paradigms and understand interventions assessing placental function and  
120 pregnancy well-being.

121 **Materials/Methods**

122 Several aspects of the impact of ferumoxytol on the Rhesus Macaque MFI were  
123 interrogated: in vitro analysis of immune cell isolation and incubation with ferumoxytol;  
124 placental explant incubation with ferumoxytol; maternal and fetal outcomes at year post-birth for  
125 rhesus that underwent ferumoxytol MRI during pregnancy vs. controls; tissue iron content,  
126 maternal plasma analysis, and histopathology analysis in a cohort of rhesus that went fetectomy  
127 after undergoing ferumoxytol MRI.

128

129 **Immune Cell Isolation and Incubation with Ferumoxytol**

130 In vitro ferumoxytol-uptake studies using monocytes and macrophages were isolated  
131 from whole blood drawn from pregnant rhesus macaques, at approximately 100gd, as previously  
132 reported [23]. Neutrophils were isolated as previously published [24]. All three cell types were  
133 incubated in ferumoxytol (Feraheme, AMAG Pharmaceuticals, Waltham, MA) at 0, 50, 100 or  
134 200  $\mu\text{g/ml}$  for 1 hour. Additionally, there were incubations of 0  $\mu\text{g/ml}$  or 200  $\mu\text{g/ml}$  with  
135 activating agents (50 ng/ml phorbol-12-myristate-13-acetate (PMA; Sigma-Aldrich, St. Louis  
136 MO)) for all cell types, 750 ng/ml ionomycin (Sigma-Aldrich, St. Louis MO) for monocytes  
137 only). Following incubation, cells were washed and fixed with 2% paraformaldehyde (PFA) for  
138 visualization of iron content by Prussian Blue staining [25-27]. Cells were imaged using a Nikon  
139 Eclipse TE300 microscope with NIS-Elements image capture.

140

141 **Placental Explant Incubations in Ferumoxytol**

142 Prior to imaging experiments, placental explants were prepared from tissues obtained  
143 from untreated animals undergoing fetectomy or caesarean section in unrelated studies, during

144 first trimester of pregnancy or at term. Explants were incubated in ferumoxytol at 0, 100 or 200  
145  $\mu\text{g/ml}$ , diluted in DMEM/F12 with 10% fetal calf serum, for 2, 4, and 24 hours at 37°C in room  
146 air/5% CO<sub>2</sub>. Explants were fixed in 2% PFA overnight and embedded in paraffin blocks. Tissues  
147 were imaged using a Nikon Eclipse TE300 microscope with NIS-Elements image capture.

148

### 149 **Prussian Blue Staining**

150 To visualize cellular iron content, isolated, fixed immune cells grown on coverslips or  
151 deparaffinized rehydrated tissue sections were incubated in Prussian blue solution [25-27] for 20  
152 minutes, washed with deionized water, and mounted with Aquapolymount (Polysciences,  
153 Warrington PA).

154

### 155 **Care and Use of Macaques**

156 Female rhesus macaques in the Wisconsin National Primate Center (WNPRC) breeding  
157 colony were housed with compatible males and monitored for breeding and menses. Pregnancies  
158 were confirmed and dated (+/- 2 days) based on menstrual cycle, observation of copulation, and  
159 ultrasound measurements of gestational sac and fetuses. Blood samples were collected using a  
160 needle and syringe or vacutainer system from the femoral or saphenous vein. All macaques were  
161 cared for by WNPRC staff in accordance with the regulations and guidelines outlined in the  
162 Animal Welfare Act and the Guide for the Care and Use of Laboratory Animals. This study was  
163 approved by the University of Wisconsin-Madison Graduate School Institutional Animal Care  
164 and Use Committee (IACUC).

165

### 166 **MRI Impact on Pregnancy Outcome and Postnatal Growth**



167           There were two imaging phases in this study. In the first phase (Supplemental Fig. 1 A),  
168 seven pregnant macaques were imaged, three with ferumoxytol and four without, to establish  
169 standard methods for anesthesia, imaging, and pilot scan settings with pregnancies proceeding to  
170 term. Infants joined the WNPRC colony and body weights during the first year of life were  
171 compared to 116 untreated macaque infants born at the WNPRC in 2016 to determine if MRI  
172 during pregnancy impacted postnatal growth. Mean and standard deviation for these colony  
173 infants were calculated at different ages, similar to the approach previously published [28].  
174 Weights of infants exposed to MRI with or without ferumoxytol in-utero that were then born into  
175 the colony were compared to this WNPRC 2016 colony growth chart through their first year of  
176 life.

177

#### 178 **Use of IL-1 $\beta$ to Induce MFI Inflammation**

179           In the second phase (Supplemental Fig. 1 B), we used a paradigm of ferumoxytol MRI  
180 following intra-amniotic injection of 10mg IL-1 $\beta$  (has been reported previously to increase  
181 decidual macrophage numbers and model chorioamnionitis and preterm labor [29,30]) or sterile  
182 saline (n=4) to test the efficacy of ferumoxytol detection of mononuclear phagocytes and  
183 inflammation [14,18-22] at the MFI. Untreated controls (n=4) did not receive intra-amniotic  
184 injections, ferumoxytol, or MRI. While the resulting R2\* maps from IL-1 $\beta$ -exposed animals did  
185 not differ from those of animals receiving intra-amniotic saline (Zhu et al, under review),  
186 comparison of saline-injected and untreated animals allows determination of any impact of  
187 ferumoxytol MRI at the MFI or on the fetus.

188

#### 189 **Intra-amniotic Injection**

190           Procedures were performed under transabdominal ultrasound guidance on the lateral  
191 aspect of the abdomen. A syringe filled with sterile saline was attached to a biopsy needle and  
192 inserted through an aseptically prepared site of the abdominal wall until the tip reached the wall  
193 of the uterus, avoiding the bowel and bladder (n=4, Supplemental Fig. 1 B). The needle was  
194 advanced into the amniotic cavity and a small amount of amniotic fluid was drawn to confirm  
195 needle placement. The contents of the syringe were then slowly injected into the amniotic cavity,  
196 and the needle was withdrawn. Following withdrawal of the needle, the insertion site in the  
197 uterus was observed by ultrasound to confirm lack of bleeding.

198

## 199 **MRI**

200           All animals that underwent an MRI exam, regardless of whether they also received  
201 ferumoxytol, were sedated by injection of up to 10 mg/kg ketamine, intubated, and anesthesia  
202 was maintained by inhalation of oxygen and 1.5% isoflurane. A pulse oximeter probe was placed  
203 and vital signs were monitored every 15 minutes. Animals were imaged in the right-lateral  
204 position and a respiratory bellow was placed around the animal's belly during imaging to enable  
205 respiratory-compensated imaging that minimizes motion-related artifacts. Animals that received  
206 ferumoxytol had an intravenous catheter placed for injection during imaging.

207           Animals that received ferumoxytol, dynamic contrast enhanced (DCE) images were  
208 acquired on a clinical 3.0T MRI system (Discovery MR750, GE Healthcare, Waukesha, WI)  
209 utilizing a 32-channel torso radiofrequency coil (Neocoil, Pewaukee, WI). Time resolved T1-  
210 weighted DCE images with 5 second temporal resolution were obtained throughout the  
211 ferumoxytol administration [17]. Ferumoxytol diluted 5:1 with normal saline was administered at  
212 4 mg/kg body weight over a 20 second interval using a power injector, followed by a 20 ml

213 saline flush at the same rate. A baseline R2\* MRI scan (an MRI relaxation parameter highly  
214 correlated and sensitive to detect iron concentration) was performed before ferumoxytol  
215 administration. R2\* measurements were estimated in the maternal, MFI, and fetal tissues by  
216 region-of-interest analysis directly from the MRI images. Follow-up R2\* MRI scans were  
217 performed on subsequent days after contrast injection to determine the persistence of  
218 ferumoxytol in various tissues. MRI acquisition parameter details can be found elsewhere [17  
219 *and* Zhu et al, under review].

220

### 221 **Fetectomy**

222 At ~gd100 the fetoplacental unit was collected via hysterotomy (n=8, Supplemental Fig.  
223 1 B). Maternal biopsies were collected aseptically during surgery and the dam recovered. The  
224 fetus was euthanized by intravenous or intracardiac injection of 50 mg/kg sodium pentobarbital.  
225 Fetal and MFI tissues were dissected for histology, iron content mass spectrometry, and protein  
226 assay.

227

### 228 **Tissue Homogenates**

229 Tissues collected at fetectomy (0.1-0.7g) (n=8, Supplemental Fig. 1 B) were  
230 homogenized in a Bullet Blender (Next Advance, Troy NY) at full power for 10 minutes with  
231 non-metal blending beads and 500  $\mu$ L PBS. Tissue homogenate was stored at -80°C until use. A  
232 96-well format micro BCA protein assay (Thermo Scientific, 23235) was used to determine  
233 protein concentrations in homogenates assayed for iron content according to the manufacturer's  
234 instructions.

235

236 **Iron content determinations**

237 Tissue homogenates were assayed for iron concentrations at the Wisconsin State  
238 Laboratory of Hygiene Trace Element Research Group in selected maternal, fetal, and MFI  
239 tissues via inductively coupled plasma - optical emission spectrometry [31-34]. The limit of  
240 detection is 1 µg/g tissue.

241

242 **Steroid Hormone Extraction and LC/MS/MS Analysis**

243 Maternal plasma samples (450 µl) collected for multi-steroid analysis from animals that  
244 had tissues collected at fetectomy (Supplemental Fig. 1 B) were extracted and assayed as  
245 previously reported [35,36]. The limit of detection is 30pg/ml for progesterone; 6pg/ml for  
246 estrone and estradiol.

247

248 **Histology**

249 Tissues collected for histology were fixed in 4% PFA overnight, 70% ethanol overnight,  
250 and routinely processed and embedded in paraffin. 5µm sections were stained with H&E and  
251 assessed by veterinary pathologists blinded to treatment groups. Tissues were evaluated for the  
252 presence or absence of physiologically significant pathologic changes, normal anatomic  
253 variations, and inflammation. Morphologic diagnoses (Supplemental Data 2) summarize these  
254 histologic findings. Organs not given a morphologic diagnosis are considered to have no  
255 significant pathologic or inflammatory changes and were scored as a 0. Severity (none=0,  
256 minimal=1, mild=2, moderate=3, severe=4) was determined by the extent and distribution of  
257 inflammation, vascular change (infarction, thrombosis, pregnancy associated vascular  
258 remodelling and/or the lack thereof), and non-vascular necrosis across the tissue section or organ

259 (multiple slides were necessary to evaluate the placenta). Scores were averaged and compared  
260 between treatment groups as previously reported [37]. Some MFI tissue sections were stained  
261 with Prussian Blue for iron localization.

262

### 263 **Statistics**

264 Iron concentrations in tissue homogenates were compared between treatment groups by  
265 2-way ANOVA and Sidak's multiple comparison test. Differences in pathology and changes in  
266 R<sup>2</sup>\* values were assessed by 2-way ANOVA. Hormone level changes were assessed by 1-way  
267 ANOVA.

268 **Results**

269 **PBMC Incubations**

270 To determine whether rhesus macaque cells take up ferumoxytol as reported with human  
271 cells [14,18-22], prior to initiating the imaging phases of this study, rhesus monocytes,  
272 macrophages, and neutrophils were incubated in 100 µg/ml ferumoxytol (Fig. 1), the  
273 approximate concentration of ferumoxytol in the blood with administration for MRI, and iron  
274 was visualized by Prussian blue staining. Staining was seen in differentiated macrophages but  
275 not monocytes or neutrophils. Activation with PMA and ionomycin did not affect iron staining.  
276 No staining was seen without ferumoxytol incubation.

277

278 **Placental Explants Incubations**

279 To determine whether placental ferumoxytol uptake by placental tissue may confound  
280 use for inflammation mapping in vivo, prior to initiating the imaging phases of this study, rhesus  
281 placental explants were incubated with ferumoxytol and stained with Prussian Blue. Modest  
282 background Prussian Blue iron staining in tissue was observed independent of ferumoxytol  
283 incubation, likely indicating endogenous iron content (Supplemental Fig. 2). Minimal increase in  
284 iron staining was observed after 2 hours of ferumoxytol-incubation. An increase in iron staining  
285 appeared after 24 hours incubation, specifically in the villous endothelium of the placental tissue.  
286 Not substantial staining of the syncytiotrophoblasts was observed, the primary interface exposed  
287 to ferumoxytol in maternal blood in vivo. Low levels of endogenous iron and modest increases in  
288 ferumoxytol uptake in control placental explants ex vivo after incubations suggests that in vivo  
289 inflammation detection by ferumoxytol-enhanced MRI would be feasible and not confounded by  
290 background placental iron content/uptake.

291

## 292 **Maternal Clinical Outcomes with Ferumoxytol Administration**

293           In addition to the 7 animals in this study that received ferumoxytol for MRI  
294 (Supplemental Fig. 1), 28 pregnant rhesus monkeys from other ongoing studies (unpublished)  
295 had up to three ferumoxytol imaging sessions. In 35 total experimental subjects who had  
296 ferumoxytol imaging sessions, two animals required moderate medical attention following  
297 ferumoxytol administration. Both animals had periocular edema following IV bolus  
298 administration of ferumoxytol that was treated with 10 mg diphenhydramine hydrochloride. One  
299 animal had a short period of increased heart rate and SPO2 levels. This animal had previous  
300 ocular swelling not associated with ferumoxytol, so it is unclear whether this event was due to  
301 ferumoxytol or other drugs used to anesthetize the animal. These mild allergic reactions  
302 responded to diphenhydramine and the animals recovered without further medical intervention.

303

## 304 **Pregnancy Outcomes**

305           Seven pregnant rhesus macaques (Supplemental Fig. 1 A) who underwent MRI gave  
306 birth via vaginal delivery at term, and the infants joined the WNPRC colony. Results of these  
307 imaging studies are described in separate reports [17,38]. Pregnancy outcomes were generally  
308 unremarkable, with one retained placenta (which occurs in ~2.6% of WNPRC pregnancies).  
309 None of the seven dams had immediate or long-term reactions to the ferumoxytol treatment.

310           Infant growth data from these pregnancies are plotted along with their birth year cohort  
311 weights (Fig. 2). The weights of the MRI offspring generally stayed within one standard  
312 deviation of the average infant weights. Infants followed normal physiological and

313 sociobehavioral patterns seen in other colony infants as assessed by daily veterinary  
314 observations.

315

### 316 **Ferumoxytol Detection by MRI Following Administration**

317 Three of the seven pregnant rhesus macaques that carried infants to term (Supplemental  
318 Fig. 1 A) had been imaged with ferumoxytol at ~100gd. Imaging occurred immediately before  
319 (to establish a baseline  $R2^*$  values in maternal, MFI, and fetal tissue) and 15 minutes after  
320 administration of ferumoxytol, followed by four follow-up MRI scans at approximately one day,  
321 one week, two weeks and three weeks following ferumoxytol administration. In all three  
322 animals, an increase in  $R2^*$  values in both the primary and secondary placental disks is seen  
323 immediately following ferumoxytol injection (Fig. 3). The  $R2^*$  values in fetal lung remained close  
324 to baseline though all scans while fetal liver  $R2^*$  values increased slightly in two of the three  
325 animals. This may reflect an increase in physiological iron transport to the fetus over time in  
326 normal pregnancy, unrelated to ferumoxytol. The  $R2^*$  values in the placenta, which increased  
327 dramatically following ferumoxytol administration, returned to approximate baseline levels  
328 within one day post-ferumoxytol, supporting a rapid clearance of ferumoxytol from the blood.  
329 Ferumoxytol accumulation in the placenta or transfer to the fetus was not detectable by  $R2^*$  (Zhu  
330 et al, under review).

331

### 332 **Iron Content in Tissues**

333 Maternal, MFI, and fetal tissues from 8 pregnancies (Supplemental Fig. 1 B) were  
334 surgically collected at ~gd100 following MRI and iron concentrations were determined in these  
335 tissues (Fig. 4). When ferumoxytol-exposed and untreated control groups were compared, only



336 maternal liver showed a significant increase in iron concentration with maternal ferumoxytol  
337 administration over control ( $p < 0.0001$ ). There are no significant differences in iron in fetal  
338 tissues in ferumoxytol vs. non-ferumoxytol-exposed animals.

339

#### 340 **Prussian Blue Staining of MFI Tissues**

341 Prussian Blue staining varied animal-to-animal in the placenta, decidua, and fetal  
342 membranes from animals that underwent fetectomy. Tissues from ferumoxytol-receiving  
343 animals, overall, did not have noticeably different staining compared to non-ferumoxytol-  
344 receiving animals. Interestingly, the animal with the most consistent staining had not received  
345 ferumoxytol (Supplemental Fig. 3), likely reflecting normal physiological iron.

346

#### 347 **Ferumoxytol Effects on Plasma Progesterone, Estrone, and Estradiol**

348 For each imaging day in animals that underwent fetectomy (Supplemental Fig. 1 B),  
349 maternal plasma samples were assessed by mass spectrometry for progesterone, estrone, and  
350 estradiol levels [35,36] to assess the impact of MRI imaging and ferumoxytol administration on  
351 placental endocrine function. Non-imaged controls (Supplemental Fig. 1 B) received a one-time  
352 plasma-collection at time of fetectomy. There was no statistically significant change in placental  
353 hormone levels following administration of ferumoxytol and hormone levels generally stayed  
354 within the range of levels seen in non-imaged controls (Fig. 5).

355

#### 356 **Ferumoxytol Effects on Histopathology**

357 Of 37 maternal and fetal tissues collected at fetectomy (Supplemental Data 1), the  
358 placenta, decidua, amniotic membranes, placental bed, maternal spleen, and maternal liver had

359 notable histopathology. Animals that did and did not receive ferumoxytol MRI had no  
360 statistically significant differences in individual tissue histopathology scores (Fig. 6).  
361 Morphologic Diagnoses are provided in Supplemental Data 2.

362 **Discussion**

363           In this study, we examined the impact of MRI with and without ferumoxytol on the  
364 fetoplacental and maternal tissues, pregnancy outcomes, and fetal well-being in the pregnant  
365 rhesus macaque. Offspring from imaged pregnancies with or without ferumoxytol had uneventful  
366 labor and normal growth in comparison with contemporary pregnancies from the WNPRC  
367 breeding colony. No significant impact of MRI with ferumoxytol on iron content or  
368 histopathology of fetal and MFI tissues (decidua, placenta, fetal membranes) was observed.  
369 Placental function as indicated by peripheral blood steroid hormone levels was unaffected by  
370 MRI with ferumoxytol. It should be noted that ferumoxytol was injected as a diluted bolus in this  
371 study, while it is administered as a slow infusion in humans to reduce the risk of anaphylactic  
372 reactions. The lack of significant adverse outcomes in the rhesus subjects also suggests the utility  
373 of ferumoxytol as a non-gadolinium contrast agent for MRI in pregnancy studies.

374           The use of ferumoxytol in MRI of pregnancy has the potential to yield important  
375 diagnostic information. Additionally, ferumoxytol-enhanced MR angiography allows for  
376 visualization of maternal uteroplacental vessels involved in transporting blood to and from the  
377 uterus, and therefore the placenta. When using ferumoxytol as the contrast agent for DCE  
378 imaging, the time of arrival of ferumoxytol-laden blood into the intervillous space and perfusion  
379 rates of blood into the individual cotyledons can be determined, which may be related to the  
380 health of the placental tissue [7,8]. Fetal vessels are not enhanced since significant ferumoxytol  
381 does not pass into the fetal circulation during MRI [17], observations further supported by fetal  
382 tissue iron data reported here.

383

384           We have shown that ferumoxytol is taken up by rhesus monkey phagocytic cells,  
385 demonstrating the feasibility of designing additional studies for its application to nonhuman  
386 primate models of adverse pregnancy outcomes. Ferumoxytol has not been applied previously to  
387 the nonhuman primate model. *In vitro* culture experiments demonstrated that the SPION was  
388 taken up by macrophages differentiated from peripheral blood monocytes, but not by  
389 undifferentiated monocytes or granulocytes. This indicates that ferumoxytol is a feasible reagent  
390 to detect the accumulation of phagocytic macrophages at sites of inflammation. Tissue  
391 macrophages take up ferumoxytol and clear these iron nanoparticles more slowly than those in  
392 the blood, therefore, sites of inflammation can be located by performing delayed imaging  
393 following ferumoxytol administration. This paradigm may help identify inflammation at the  
394 MFI, which could predict an insult to the pregnancy.

395           Concerns about ferumoxytol uptake by the placenta and the potential for transport of  
396 elevated levels of iron to the fetus, putting the fetus at risk for hemochromatosis or pulmonary  
397 hemosiderosis since these disorders result in fetal growth restriction, hepatic failure, alveolar  
398 hemorrhage, and stillbirth [39-41] were addressed. Placental villous explants were incubated *in*  
399 *vitro* with physiologically realistic concentrations of ferumoxytol, and staining of explant tissue  
400 sections for iron content with Prussian Blue did not demonstrate any significant uptake of SPION  
401 by placental tissues in a physiologically meaningful pattern (i.e., syncytiotrophoblast uptake) that  
402 would be anticipated with exposure of the placenta to ferumoxytol in the maternal blood in the  
403 intervillous space. With *in vivo* treatment of pregnant rhesus macaques, there was no significant  
404 impact on maternal health, pregnancy outcome, or postnatal fetal development. Pilot studies used  
405 to establish the parameters for imaging, indicated that offspring from survival pregnancies  
406 showed uneventful labor and normal fetal/infant growth compared to contemporary pregnancies

407 from the WNPRC breeding colony. Furthermore, the dose of ferumoxytol used in these animal  
408 studies, while allowing sensitive imaging of the MFI, is quite low (4 mg/kg) compared to human  
409 therapeutic dosing for anemia. This underscores the expected safety of ferumoxytol in this  
410 pregnancy model.

411         The fetus acquires iron during pregnancy through transferrin receptor acquisition of  
412 ferritin and transit across the placental syncytiotrophoblast and cytotrophoblast to the fetal  
413 vasculature within villous stroma [42]. Placental tissues collected from MRI experiments and  
414 stained with Prussian Blue for iron content did not reveal discernible differences between tissues  
415 from control and ferumoxytol-treated pregnancies. Additionally, decidual tissues and fetal  
416 membranes did not demonstrate any consistent differences between experimental groups. There  
417 were focally distributed areas of iron detected by Prussian Blue staining, however interestingly,  
418 the tissues with the clearest demonstration of iron content were the decidua and fetal membranes  
419 rather than the placental villi. It is important to note that the animal in which iron was most  
420 readily demonstrated in these tissues did *not* receive ferumoxytol and thus SPION-delivered iron  
421 was not the source of Prussian Blue staining. These data suggest that although the placenta  
422 directly transports iron to the fetus via a biologically conserved ferritin/ferritin receptor-mediated  
423 pathway, this active pathway does not participate in the uptake of ferumoxytol by the  
424 syncytiotrophoblasts. While the mechanism of ferumoxytol's uptake by macrophages has not  
425 been determined, similar dextran-coated SPIONs are taken up by phagocytosis or SR-A-  
426 mediated endocytosis [43-45]. We hypothesize that cellular iron sequestration, as indicated by  
427 Prussian Blue staining, may be largely attributable to macrophage uptake of erythrocytes as a  
428 routine surveillance function at the MFI.

429 Consistent with a lack of increase in iron content of MFI tissues by histochemical  
430 methods, there was no significant increase in iron concentration in MFI tissues by mass  
431 spectrometry. Likewise, fetal tissues that would be anticipated to accumulate iron, did not show a  
432 statistically significant increase. While there does appear to be a trend for slightly higher, though  
433 not statistically significant, iron content in fetal tissues, further studies will be needed to  
434 determine if this is a consistent result. There was a statistically significant increase in maternal  
435 liver iron content, which was expected since the liver is a main clearance organ for ferumoxytol,  
436 with resident hepatic macrophages (Kupffer cells) taking up ferumoxytol particles in studies in  
437 rabbit [46] and human subjects [47,48].

438 Histopathology was evaluated in selected maternal tissues, the MFI, and in fetal tissues.  
439 There was no detectable histopathology in any fetal tissues. While histopathology was noted in  
440 tissues at the MFI, there were not significant differences between ferumoxytol-receiving and  
441 control animals. Some histopathological features were noted among placentas even in untreated  
442 “normal” pregnancies. This lack of a difference in pathological findings in placental, decidual,  
443 and fetal membrane specimens from the animals in study also supports the use of ferumoxytol in  
444 this animal model. Functional assessment of the placenta by monitoring of placental hormone  
445 secretion (progesterone, estradiol, estrone) likewise revealed no significant difference between  
446 animals receiving ferumoxytol MRI imaging, and untreated animals.

447 The data presented in this report were part of a larger study in which some fetuses  
448 received IL-1B via an intra-amniotic injection with the goal of inciting trafficking of  
449 inflammatory phagocytes to the MFI [29,30]. Ferumoxytol MRI and histochemical and mass  
450 spectrometry analyses did not support an increase in iron-retaining cells at the MFI. This  
451 previously published model reported increased numbers of macrophages and granulocytes in the

452 decidua parietalis, however that study did not evaluate the decidua basalis which we  
453 hypothesized would be imaged with Ferumoxytol treatment. While our study did not validate the  
454 use of Ferumoxytol with this model due to lack of induced inflammation, it is possible that other  
455 nonhuman primate models of adverse pregnancy outcomes and MFI inflammation, including  
456 maternal infection with *Listeria monocytogenes* [49] or Zika virus [37,50-52] which have been  
457 shown to provoke significant inflammation in the decidua basalis with significant placental  
458 pathology, may more productively demonstrate the efficacy of ferumoxytol for detection of  
459 inflammation at the MFI. Furthermore, a placenta facing a bacterial or viral insult may have  
460 altered placental transporter protein expression, which may affect ferumoxytol's ability to pass  
461 into the fetal blood circulation [53]. Use of these pregnancy models in ferumoxytol MRI may  
462 reveal important experimental utility of the SPION.

463         The use of an animal model to evaluate MRI methodologies has significant advantages.  
464 The pregnant dam is anesthetized for the imaging procedure in the nonhuman primate model,  
465 and the inhaled anesthetic is transferred to the fetus, which is also anesthetized. Therefore, the  
466 fetal motion is minimized in MRI of the animals, leading to reliable MRI results. This  
467 experiment setup provided unique opportunity to validate the feasibility of MRI methodologies  
468 without the fetal motion being a confounding factor. However, anesthesia is not the standard of  
469 care for MRI evaluation of pregnant humans. The potential fetal motion in MRI of pregnant  
470 human subjects need to be addressed. A motion-robust R2\* mapping technique has been  
471 proposed by our group and is under separate study (Zhu et al, under review). Upon successful  
472 validation, the motion-robust MRI technique may enable assessing detection macrophage  
473 homing in pregnant women. Other common MRI imaging strategies for motion include motion  
474 prevention (e.g. coaching, breath holding), imaging artifact reduction (e.g. physiological

475 triggering and gating, fast imaging readouts), and motion correction (e.g. navigators,  
476 prospective/retrospective corrections) [54]. These, and other strategies, are commonly used in  
477 body imaging applications (i.e. cardiac, lung, abdominal) where motion is of substantial concern  
478 for producing diagnostic quality MR images..

479         In summary, we conclude that ferumoxytol administration for imaging in this rhesus  
480 pregnancy model is feasible. Future studies will explore the use of ferumoxytol to detect  
481 placental inflammation and the diagnostic value of DCE MRI in the presence of placental  
482 dysfunction. The rhesus macaque will be an important platform for initial development of novel  
483 imaging approaches in an experimentally tractable model.



484 **Acknowledgment**

485 The authors wish to thank GE Healthcare who provides research support to the University of  
486 Wisconsin-Madison and AMAG Pharmaceuticals for providing Ferumoxytol for this study.  
487 Further, Dr. Reeder is a Romnes Faculty Fellow, and has received an award provided by the  
488 University of Wisconsin-Madison Office of the Vice Chancellor for Research and Graduate  
489 Education with funding from the Wisconsin Alumni Research Foundation.

490 **References**

- 491 1. Alexander BT. Placental insufficiency leads to development of hypertension in growth-  
492 restricted offspring. *Hypertension* 2003; 41:457-462.
- 493 2. Brosens I, Pijnenborg R, Vercruyse L, Romero R. The "Great Obstetrical Syndromes"  
494 are associated with disorders of deep placentation. *Am J Obstet Gynecol* 2011; 204:193-201.
- 495 3. Krishna U, Bhalerao S. Placental insufficiency and fetal growth restriction. *J Obstet*  
496 *Gynaecol India* 2011; 61:505-511.
- 497 4. Roberts DJ, Post MD. The placenta in pre-eclampsia and intrauterine growth restriction. *J*  
498 *Clin Pathol* 2008; 61:1254-1260.
- 499 5. Chalouhi GE, Deloison B, Siauve N, Aimot S, Balvay D, Cuenod CA, Ville Y, Clément  
500 O, Salomon LJ. Dynamic contrast-enhanced magnetic resonance imaging: definitive imaging of  
501 placental function? *Semin Fetal Neonatal Med* 2011; 16:22-28.
- 502 6. Lohrke J, Frenzel T, Endrikat J, Alves FC, Grist TM, Law M, Lee JM, Leiner T, Li KC,  
503 Nikolaou K, Prince MR, Schild HH, et al. 25 Years of Contrast-Enhanced MRI: Developments,  
504 Current Challenges and Future Perspectives. *Adv Ther* 2016; 33:1-28.
- 505 7. Frias AE, Schabel MC, Roberts VH, Tudorica A, Grigsby PL, Oh KY, Kroenke CD.  
506 Using dynamic contrast-enhanced MRI to quantitatively characterize maternal vascular  
507 organization in the primate placenta. *Magn Reson Med* 2015; 73:1570-1578.
- 508 8. Schabel MC, Roberts VHJ, Lo JO, Platt S, Grant KA, Frias AE, Kroenke CD. Functional  
509 imaging of the nonhuman primate Placenta with endogenous blood oxygen level-dependent  
510 contrast. *Magn Reson Med* 2016; 76:1551-1562.
- 511 9. Siauve N, Chalouhi GE, Deloison B, Alison M, Clement O, Ville Y, Salomon LJ.  
512 Functional imaging of the human placenta with magnetic resonance. *Am J Obstet Gynecol* 2015;

513 213:S103-114.

514 10. Rogosnitzky M, Branch S. Gadolinium-based contrast agent toxicity: a review of known  
515 and proposed mechanisms. *Biometals* 2016; 29:365-376.

516 11. Oh KY, Roberts VH, Schabel MC, Grove KL, Woods M, Frias AE. Gadolinium Chelate  
517 Contrast Material in Pregnancy: Fetal Biodistribution in the Nonhuman Primate. *Radiology*  
518 2015; 276:110-118.

519 12. Prola-Netto J, Woods M, Roberts VHJ, Sullivan EL, Miller CA, Frias AE, Oh KY.  
520 Gadolinium Chelate Safety in Pregnancy: Barely Detectable Gadolinium Levels in the Juvenile  
521 Nonhuman Primate after in Utero Exposure. *Radiology* 2018; 286:122-128.

522 13. Kanal E, Barkovich AJ, Bell C, Borgstede JP, Bradley WG, Froelich JW, Gimbel JR,  
523 Gosbee JW, Kuhni-Kaminski E, Larson PA, Lester JW, Nyenhuis J, et al. ACR guidance  
524 document on MR safe practices: 2013. *J Magn Reson Imaging* 2013; 37:501-530.

525 14. Bashir MR, Bhatti L, Marin D, Nelson RC. Emerging applications for ferumoxytol as a  
526 contrast agent in MRI. *J Magn Reson Imaging* 2015; 41:884-898.

527 15. Knobloch G, Colgan T, Wiens CN, Wang X, Schubert T, Hernando D, Sharma SD,  
528 Reeder SB. Relaxivity of Ferumoxytol at 1.5 T and 3.0 T. *Invest Radiol* 2018; 53:257-263.

529 16. Ludwig KD, Fain SB, Adamson EB, Nguyen S, Golos TG, Reeder SB, Bird IM, Wieben  
530 O, Shah DM, Johnson KM. Quantitative ferumoxytol DCE MRI of the primate placental  
531 perfusion domains. Proceedings from the 26th Annual Meeting of ISMRM. Paris, France. June  
532 2018.

533 17. Ludwig KD, Fain SB, Nguyen SM, Golos TG, Reeder SB, Bird IM, Shah DM, Wieben  
534 OE, Johnson KM. Perfusion of the placenta assessed using arterial spin labeling and ferumoxytol  
535 dynamic contrast enhanced magnetic resonance imaging in the rhesus macaque. *Magn Reson*

- 536 Med 2018.
- 537 18. Toth GB, Varallyay CG, Horvath A, Bashir MR, Choyke PL, Daldrup-Link HE, Dosa E,  
538 Finn JP, Gahramanov S, Harisinghani M, Macdougall I, Neuwelt A, et al. Current and potential  
539 imaging applications of ferumoxytol for magnetic resonance imaging. *Kidney Int* 2017; 92:47-  
540 66.
- 541 19. Hasan DM, Amans M, Tihan T, Hess C, Guo Y, Cha S, Su H, Martin AJ, Lawton MT,  
542 Neuwelt EA, Saloner DA, Young WL. Ferumoxytol-enhanced MRI to Image Inflammation  
543 within Human Brain Arteriovenous Malformations: A Pilot Investigation. *Transl Stroke Res*  
544 2012; 3:166-173.
- 545 20. Iv M, Samghabadi P, Holdsworth S, Gentles A, Rezaii P, Harsh G, Li G, Thomas R,  
546 Moseley M, Daldrup-Link HE, Vogel H, Wintermark M, et al. Quantification of Macrophages in  
547 High-Grade Gliomas by Using Ferumoxytol-enhanced MRI: A Pilot Study. *Radiology*  
548 2018:181204.
- 549 21. Neuwelt A, Sidhu N, Hu CA, Mlady G, Eberhardt SC, Sillerud LO. Iron-based  
550 superparamagnetic nanoparticle contrast agents for MRI of infection and inflammation. *AJR Am*  
551 *J Roentgenol* 2015; 204:W302-313.
- 552 22. Gaglia JL, Harisinghani M, Aganj I, Wojtkiewicz GR, Hedgire S, Benoist C, Mathis D,  
553 Weissleder R. Noninvasive mapping of pancreatic inflammation in recent-onset type-1 diabetes  
554 patients. *Proc Natl Acad Sci U S A* 2015; 112:2139-2144.
- 555 23. Rozner AE, Dambaeva SV, Drenzek JG, Durning M, Golos TG. Generation of  
556 macrophages from peripheral blood monocytes in the rhesus monkey. *J Immunol Methods* 2009;  
557 351:36-40.
- 558 24. Roberts RL, Gallin JI. Rapid method for isolation of normal human peripheral blood

- 559 eosinophils on discontinuous Percoll gradients and comparison with neutrophils. *Blood* 1985;  
560 65:433-440.
- 561 25. Sheehan D, Hrapchak B. *Theory and practice of Histotechnology*, 2nd Ed, 1980, pp217-  
562 218, Battelle Press, Ohio.
- 563 26. Luna L. *Manual of Histologic Staining Methods of the AFIP*, 3rd Ed, 1968, pp 183,  
564 McGraw-Hill, NY.
- 565 27. Crookham J, Dapson R. *Hazardous Chemicals in the Histopathology Laboratory*, 2nd  
566 ED, 1991, Anatech.
- 567 28. Tarantal AF. Ultrasound Imaging in Rhesus (*Macaca mulatta*) and Long-tailed (*Macaca*  
568 *fascicularis*) Macaques: Reproductive and Research Applications. In: Wolfe-Coote S, editor. *The*  
569 *Laboratory Primate*. London: Elsevier; 2005. p. 317–52.
- 570 29. Presicce P, Senthamarai kanna n P, Alvarez M, Rueda CM, Cappelletti M, Miller LA, Jobe  
571 AH, Chougnet CA, Kallapur SG. Neutrophil recruitment and activation in decidua with intra-  
572 amniotic IL-1beta in the preterm rhesus macaque. *Biol Reprod* 2015; 92:56.
- 573 30. Kallapur SG, Presicce P, Senthamarai kanna n P, Alvarez M, Tarantal AF, Miller LM,  
574 Jobe AH, Chougnet CA. Intra-amniotic IL-1 $\beta$  induces fetal inflammation in rhesus monkeys and  
575 alters the regulatory T cell/IL-17 balance. *J Immunol* 2013; 191:1102-1109.
- 576 31. Krynitsky AJ. Preparation of Biological Tissue for the Determination of Arsenic and  
577 Selenium by Graphite Furnace Atomic Absorption Spectrometry. *Anal. Chem.*, Vol. 59, pp  
578 1884-1886. (1987).
- 579 32. Giesy JP, Wagner JG. Frequency Distributions of Trace Metal Concentrations in Five  
580 Freshwater Fishes. *Trans. Am. Fis. Soc.*, Vol. 106, No. 4, pp 393-403. (1977),
- 581 33. *Test Methods for Evaluating Solid Waste Physical/Chemical Methods*. Third edition,

- 582 SW-846, USEPA. November 1986, including July 1992, August 1993, September 1994, and  
583 January 1995 updates. Method 6010B.
- 584 34. Methods for the Determination of Metals in Environmental Samples. USEPA, 200.7,  
585 1994.
- 586 35. Kenealy BP, Kapoor A, Guerriero KA, Keen KL, Garcia JP, Kurian JR, Ziegler TE,  
587 Terasawa E. Neuroestradiol in the hypothalamus contributes to the regulation of gonadotropin  
588 releasing hormone release. *J Neurosci* 2013; 33:19051-19059.
- 589 36. Kenealy BP, Keen KL, Kapoor A, Terasawa E. Neuroestradiol in the Stalk Median  
590 Eminence of Female Rhesus Macaques Decreases in Association With Puberty Onset.  
591 *Endocrinology* 2016; 157:70-76.
- 592 37. Nguyen SM, Antony KM, Dudley DM, Kohn S, Simmons HA, Wolfe B, Salamat MS,  
593 Teixeira LBC, Wiepz GJ, Thoong TH, Aliota MT, Weiler AM, et al. Highly efficient maternal-  
594 fetal Zika virus transmission in pregnant rhesus macaques. *PLoS Pathog* 2017; 13:e1006378.
- 595 38. Macdonald JA, Corrado PA, Nguyen SM, Johnson KM, Francois CJ, Magness RR, Shah  
596 DM, Golos TG, Wieben O. Uteroplacental and Fetal 4D Flow MRI in the Pregnant Rhesus  
597 Macaque. *J Magn Reson Imaging* 2018.
- 598 39. Kelly AL, Lunt PW, Rodrigues F, Berry PJ, Flynn DM, McKiernan PJ, Kelly DA, Mieli-  
599 Vergani G, Cox TM. Classification and genetic features of neonatal haemochromatosis: a study  
600 of 27 affected pedigrees and molecular analysis of genes implicated in iron metabolism. *J Med*  
601 *Genet* 2001; 38:599-610.
- 602 40. Fellman V, Rapola J, Pihko H, Varilo T, Raivio KO. Iron-overload disease in infants  
603 involving fetal growth retardation, lactic acidosis, liver haemosiderosis, and aminoaciduria.  
604 *Lancet* 1998; 351:490-493.

- 605 41. Limme B, Nicolescu R, Misson JP. Neonatal pulmonary hemosiderosis. *Case Rep Pediatr*  
606 2014; 2014:463973.
- 607 42. Fuchs R, Ellinger I. Endocytic and transcytotic processes in villous syncytiotrophoblast:  
608 role in nutrient transport to the human fetus. *Traffic* 2004; 5:725-738.
- 609 43. Corot C, Robert P, Idée JM, Port M. Recent advances in iron oxide nanocrystal  
610 technology for medical imaging. *Adv Drug Deliv Rev* 2006; 58:1471-1504.
- 611 44. Raynal I, Prigent P, Peyramaure S, Najid A, Rebuzzi C, Corot C. Macrophage  
612 endocytosis of superparamagnetic iron oxide nanoparticles: mechanisms and comparison of  
613 ferumoxides and ferumoxtran-10. *Invest Radiol* 2004; 39:56-63.
- 614 45. Feng Q, Liu Y, Huang J, Chen K, Xiao K. Uptake, distribution, clearance, and toxicity of  
615 iron oxide nanoparticles with different sizes and coatings. *Sci Rep* 2018; 8:2082.
- 616 46. Yancy AD, Olzinski AR, Hu TC, Lenhard SC, Aravindhan K, Gruver SM, Jacobs PM,  
617 Willette RN, Jucker BM. Differential uptake of ferumoxtran-10 and ferumoxytol, ultrasmall  
618 superparamagnetic iron oxide contrast agents in rabbit: critical determinants of atherosclerotic  
619 plaque labeling. *J Magn Reson Imaging* 2005; 21:432-442.
- 620 47. Lim JH, Choi D, Cho SK, Kim SH, Lee WJ, Lim HK, Park CK, Paik SW, Kim YI.  
621 Conspicuity of hepatocellular nodular lesions in cirrhotic livers at ferumoxides-enhanced MR  
622 imaging: importance of Kupffer cell number. *Radiology* 2001; 220:669-676.
- 623 48. Ramanathan RK, Korn RL, Raghunand N, Sachdev JC, Newbold RG, Jameson G,  
624 Fetterly GJ, Prey J, Klinz SG, Kim J, Cain J, Hendriks BS, et al. Correlation between  
625 Ferumoxytol Uptake in Tumor Lesions by MRI and Response to Nanoliposomal Irinotecan in  
626 Patients with Advanced Solid Tumors: A Pilot Study. *Clin Cancer Res* 2017; 23:3638-3648.
- 627 49. Wolfe B, Wiepz GJ, Schotzko M, Bondarenko GI, Durning M, Simmons HA, Mejia A,

- 628 Faith NG, Sampene E, Suresh M, Kathariou S, Czuprynski CJ, et al. Acute Fetal Demise with  
629 First Trimester Maternal Infection Resulting from *Listeria monocytogenes* in a Nonhuman  
630 Primate Model. MBio 2017; 8.
- 631 50. Mohr EL, Block LN, Newman CM, Stewart LM, Koenig M, Semler M, Breitbach ME,  
632 Teixeira LBC, Zeng X, Weiler AM, Barry GL, Thoong TH, et al. Ocular and uteroplacental  
633 pathology in a macaque pregnancy with congenital Zika virus infection. PLoS One 2018;  
634 13:e0190617.
- 635 51. Dudley DM, Aliota MT, Mohr EL, Weiler AM, Lehrer-Brey G, Weisgrau KL, Mohns  
636 MS, Breitbach ME, Rasheed MN, Newman CM, Gellerup DD, Moncla LH, et al. A rhesus  
637 macaque model of Asian-lineage Zika virus infection. Nat Commun 2016; 7:12204.
- 638 52. Hirsch AJ, Roberts VHJ, Grigsby PL, Haese N, Schabel MC, Wang X, Lo JO, Liu Z,  
639 Kroenke CD, Smith JL, Kelleher M, Broeckel R, et al. Zika virus infection in pregnant rhesus  
640 macaques causes placental dysfunction and immunopathology. Nat Commun 2018; 9:263.
- 641 53. Lye P, Bloise E, Javam M, Gibb W, Lye SJ, Matthews SG. Impact of bacterial and viral  
642 challenge on multidrug resistance in first- and third-trimester human placenta. Am J Pathol 2015;  
643 185:1666-1675.
- 644 54. Zaitsev M, Maclaren J, Herbst M. Motion artifacts in MRI: A complex problem with  
645 many partial solutions. J Magn Reson Imaging 2015; 42:887-901.



646 **Figure Legends**

647 **Fig. 1. Localization of iron in rhesus immune cells incubated with ferumoxytol.** Peripheral  
648 blood neutrophils (left), monocytes (center), and *in vitro*-differentiated macrophages (right) from  
649 rhesus macaque whole blood were incubated in 100  $\mu\text{g/ml}$  ferumoxytol for 1 hour and stained  
650 with Prussian Blue. Photomicrographs are of cytopins of neutrophils, or monocytes or  
651 macrophages grown on coverslips in culture.

652

653 **Fig. 2. Infant growth rates with maternal ferumoxytol treatment compared to animal**  
654 **colony controls.** The black line represents the mean weight (kg) for 116 infants born at the  
655 WNPRC in 2016, weighed at the age in days listed on the x-axis. The grey lines represent one  
656 standard deviation from the mean. Purple lines represent one animal each that was imaged by  
657 MRI without ferumoxytol. Aqua lines represent one animal each that was imaged with  
658 ferumoxytol, plus 4 additional scans without additional ferumoxytol administration. The  
659 irregular mean and standard deviation lines reflect the fact that not all colony animals were  
660 weighted on any given day so the data represent a different population of animals at any specific  
661 time point.

662

663 **Fig. 3. R2\* values following ferumoxytol injection.** R2\* values were monitored in 3 pregnant  
664 rhesus macaques immediately following and 1 day, 1 week, 2 weeks, and 3 weeks ferumoxytol  
665 injection. The image on the top right is a representative Dynamic Contrast Enhanced (DCE)  
666 image of maternal and uterine ferumoxytol detection, including placental intervillous flow,  
667 illustrating the imaging data used to determine R2\* values. The first point represents pre-  
668 injection (“0, pre-feru”) and the second point represents the same day post-injection (“0, post-

669 feru”). Primary placental disc values are in dark blue, secondary placenta in aqua, fetal lung in  
670 orange, and fetal liver in green.

671

672 **Fig. 4. Iron content of maternal and fetal tissues.** Iron content of selected tissues was  
673 determined by mass spectrometry. Non-imaged animals are represented by grey circles (n=4).  
674 Animals that received ferumoxytol imaging with intra-amniotic saline are in blue (n=4, except  
675 for maternal liver and maternal spleen where n=3). Mean and standard error are denoted by  
676 horizontal lines for each tissue.

677

678 **Fig. 5. Plasma hormone levels in MRI animals assessed by mass spectrometry.** Blue lines  
679 represent progesterone, estrogen, and estradiol levels in ferumoxytol-infused animals before  
680 injection, 24h following injection, and 48h or 72h following injection. Black plus signs (+)  
681 represent single blood draw readings from non-ferumoxytol control animals, indicating the  
682 expected range of peripheral blood steroid hormone levels in pregnant macaques.

683

684 **Fig. 6. Chart summarizing histopathology scores of all tissues that showed pathology.** For  
685 each animal, the circle representing each tissue is colored to denote severity of pathology. The  
686 top 4 rows represent the ferumoxytol-receiving intra-amniotic saline animals and the bottom 4  
687 rows are for non-ferumoxytol non-MRI controls. Numbers were assigned to each severity rating  
688 and used to analyze pathologies (normal=0, minimal=1, mild=2, moderate=3, severe=4). The  
689 chart below presents the average pathology scores for each tissue per treatment, used to assess  
690 statistical significance.

691

692 **Supplemental Data Legends**

693 **Supplemental Fig. 1. Experimental Design.** Monkey outlines represent a single animal that  
694 received each treatment, represented on their respective timeline. (A) Blue timelines outline  
695 experimental design for animals where pregnancy proceeded to term and the infants were born  
696 by spontaneous vaginal delivery. (B) Pink timelines outline the series of procedures that animals  
697 received whose pregnancies were terminated by fetectomy. IA=intra-amniotic, FTX=fetectomy.  
698

699 **Supplemental Fig. 2. Histological analysis of rhesus placental explants.** Placental explants  
700 from tissue from first (left column) and third (right column) trimester pregnancies were  
701 incubated in ferumoxytol for 2 and 24 hours (200  $\mu$ g/ml ferumoxytol for first trimester, 100  
702  $\mu$ g/ml ferumoxytol for third trimester). Original experiments were at the 200  $\mu$ g/ml  
703 concentration but changed to 100  $\mu$ g/ml as this concentration better reflects the concentration of  
704 ferumoxytol in the blood when imaging. Tissue explants were embedded in paraffin and sections  
705 were cut and stained with Prussian Blue to localize iron. The top row shows control tissue that  
706 was not incubated in ferumoxytol. The middle row shows the 2 hour incubation. The bottom row  
707 shows the 24 hour incubation.  
708

709 **Supplemental Fig. 3. Histochemical analysis of iron at the MFI.** The left image presents a  
710 representative chorioamniotic membrane sample stained with Prussian Blue, the right image  
711 presents a full-thickness placental section (with decidua and membranes attached) similarly  
712 stained. Both samples were collected from a non-MRI, non-ferumoxytol control animal. The  
713 lower panels present a higher magnification view of the regions depicted by rectangles in the  
714 upper panels. These images are from an animal that did not receive ferumoxytol, the degree of

715 Prussian Blue staining was not seen to increase in animals that received ferumoxytol (not  
716 shown).

717

718 **Supplemental Data 1. Tissues Collected at Fetectomy.** The table presents the tissues collected  
719 from dams and fetuses at fetectomy after ferumoxytol MRI, or from untreated pregnancies.

720

721 **Supplemental Data 2. Pathology Reports.** The table describes full pathology reports for the  
722 tissues summarized in Fig. 6.



# Neutrophils

# Monocytes

# Macrophages

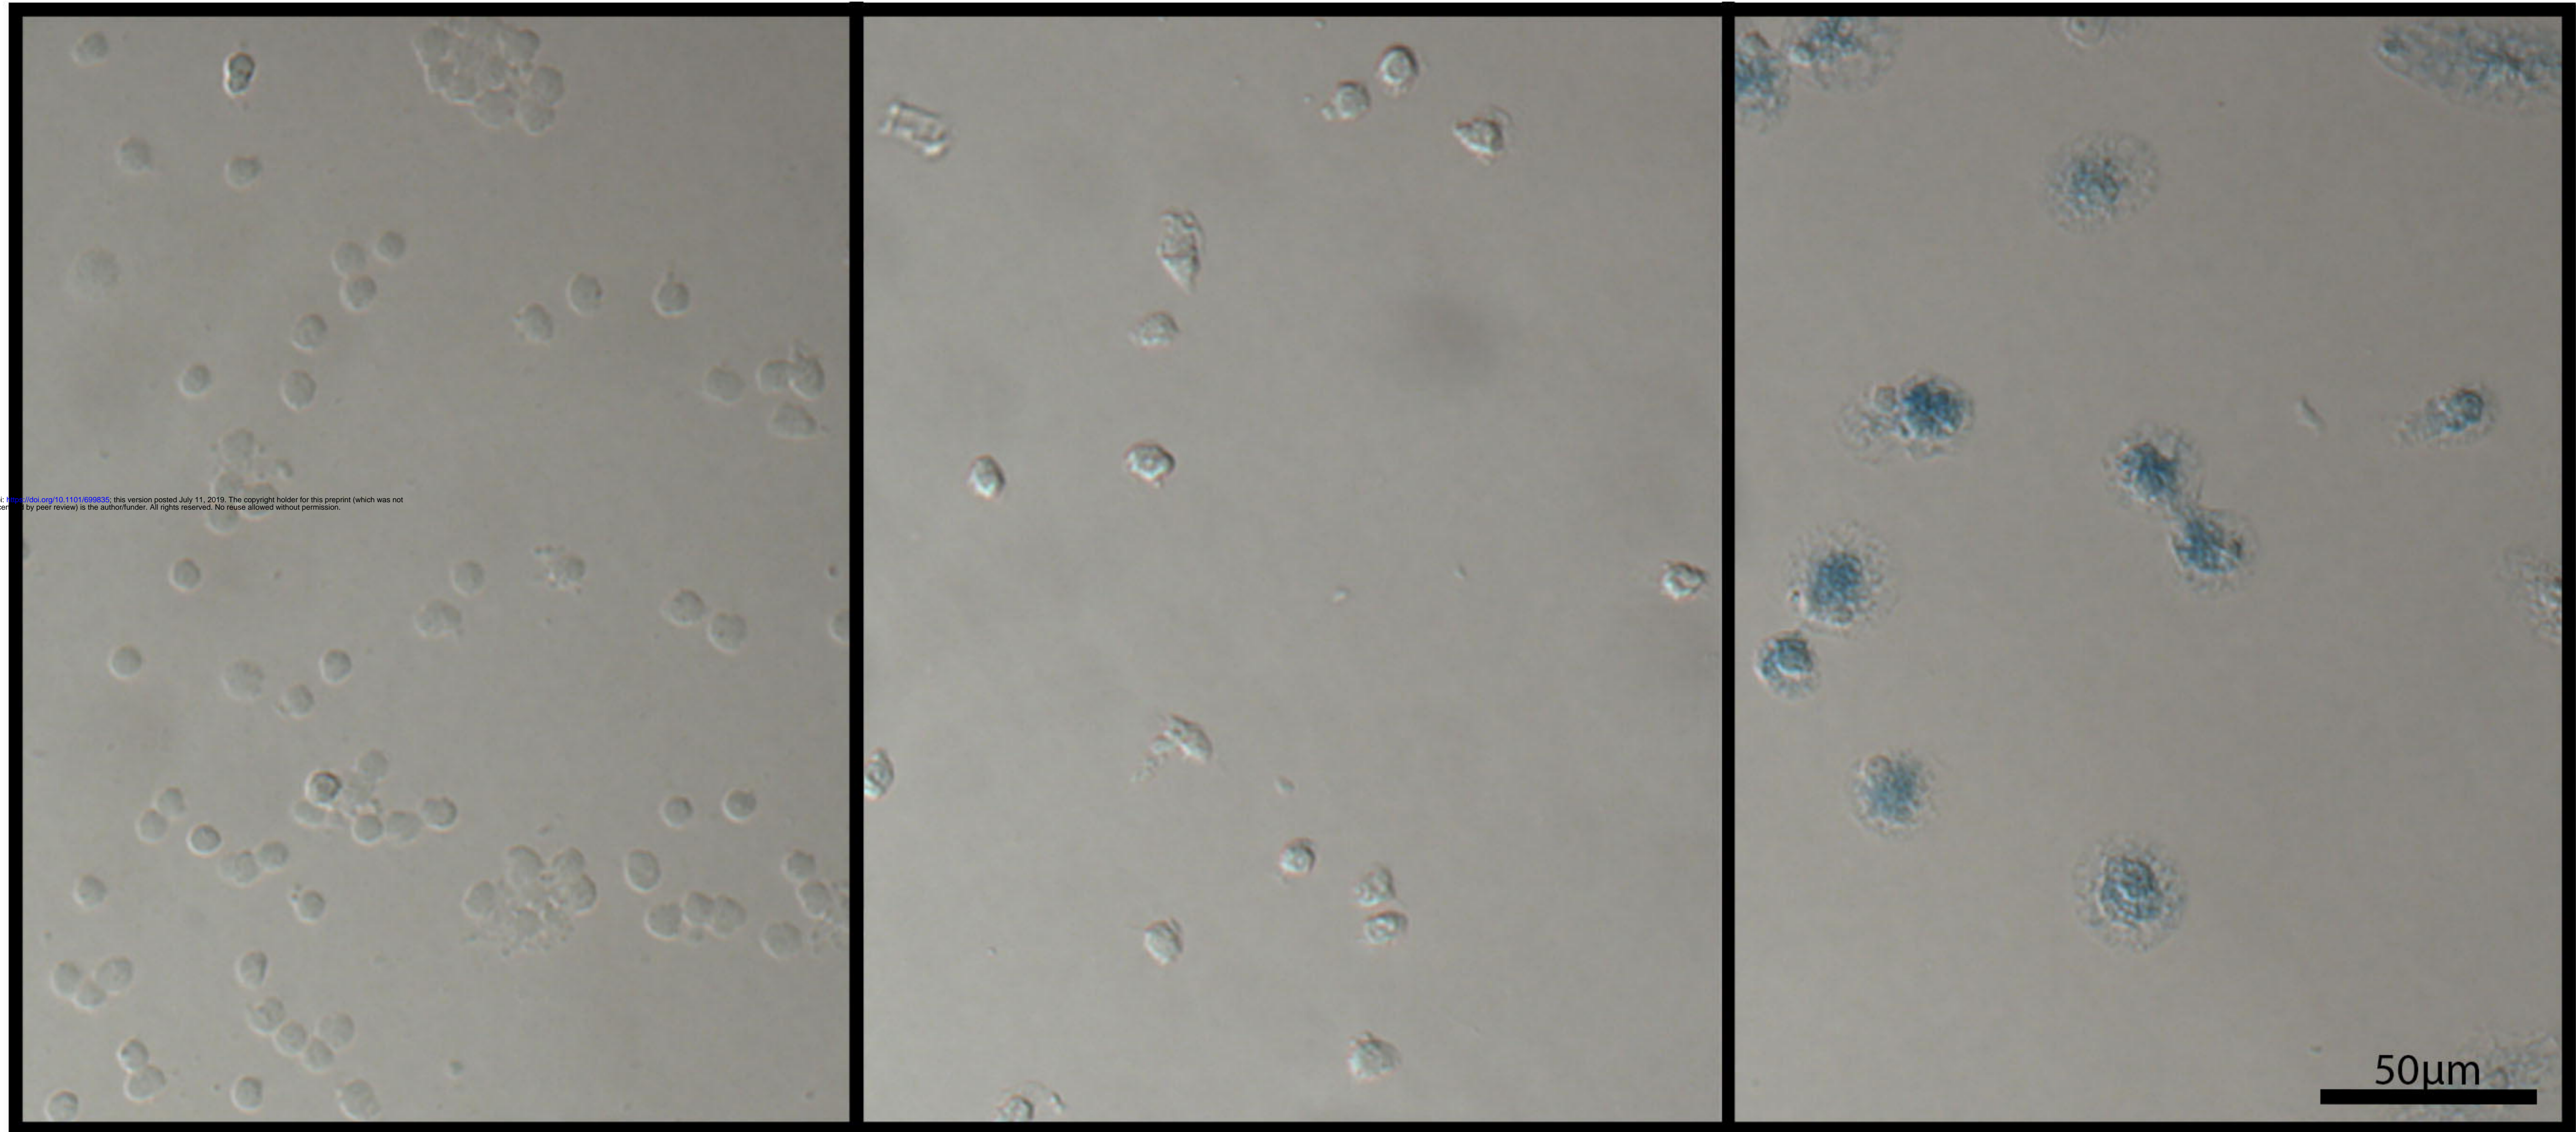



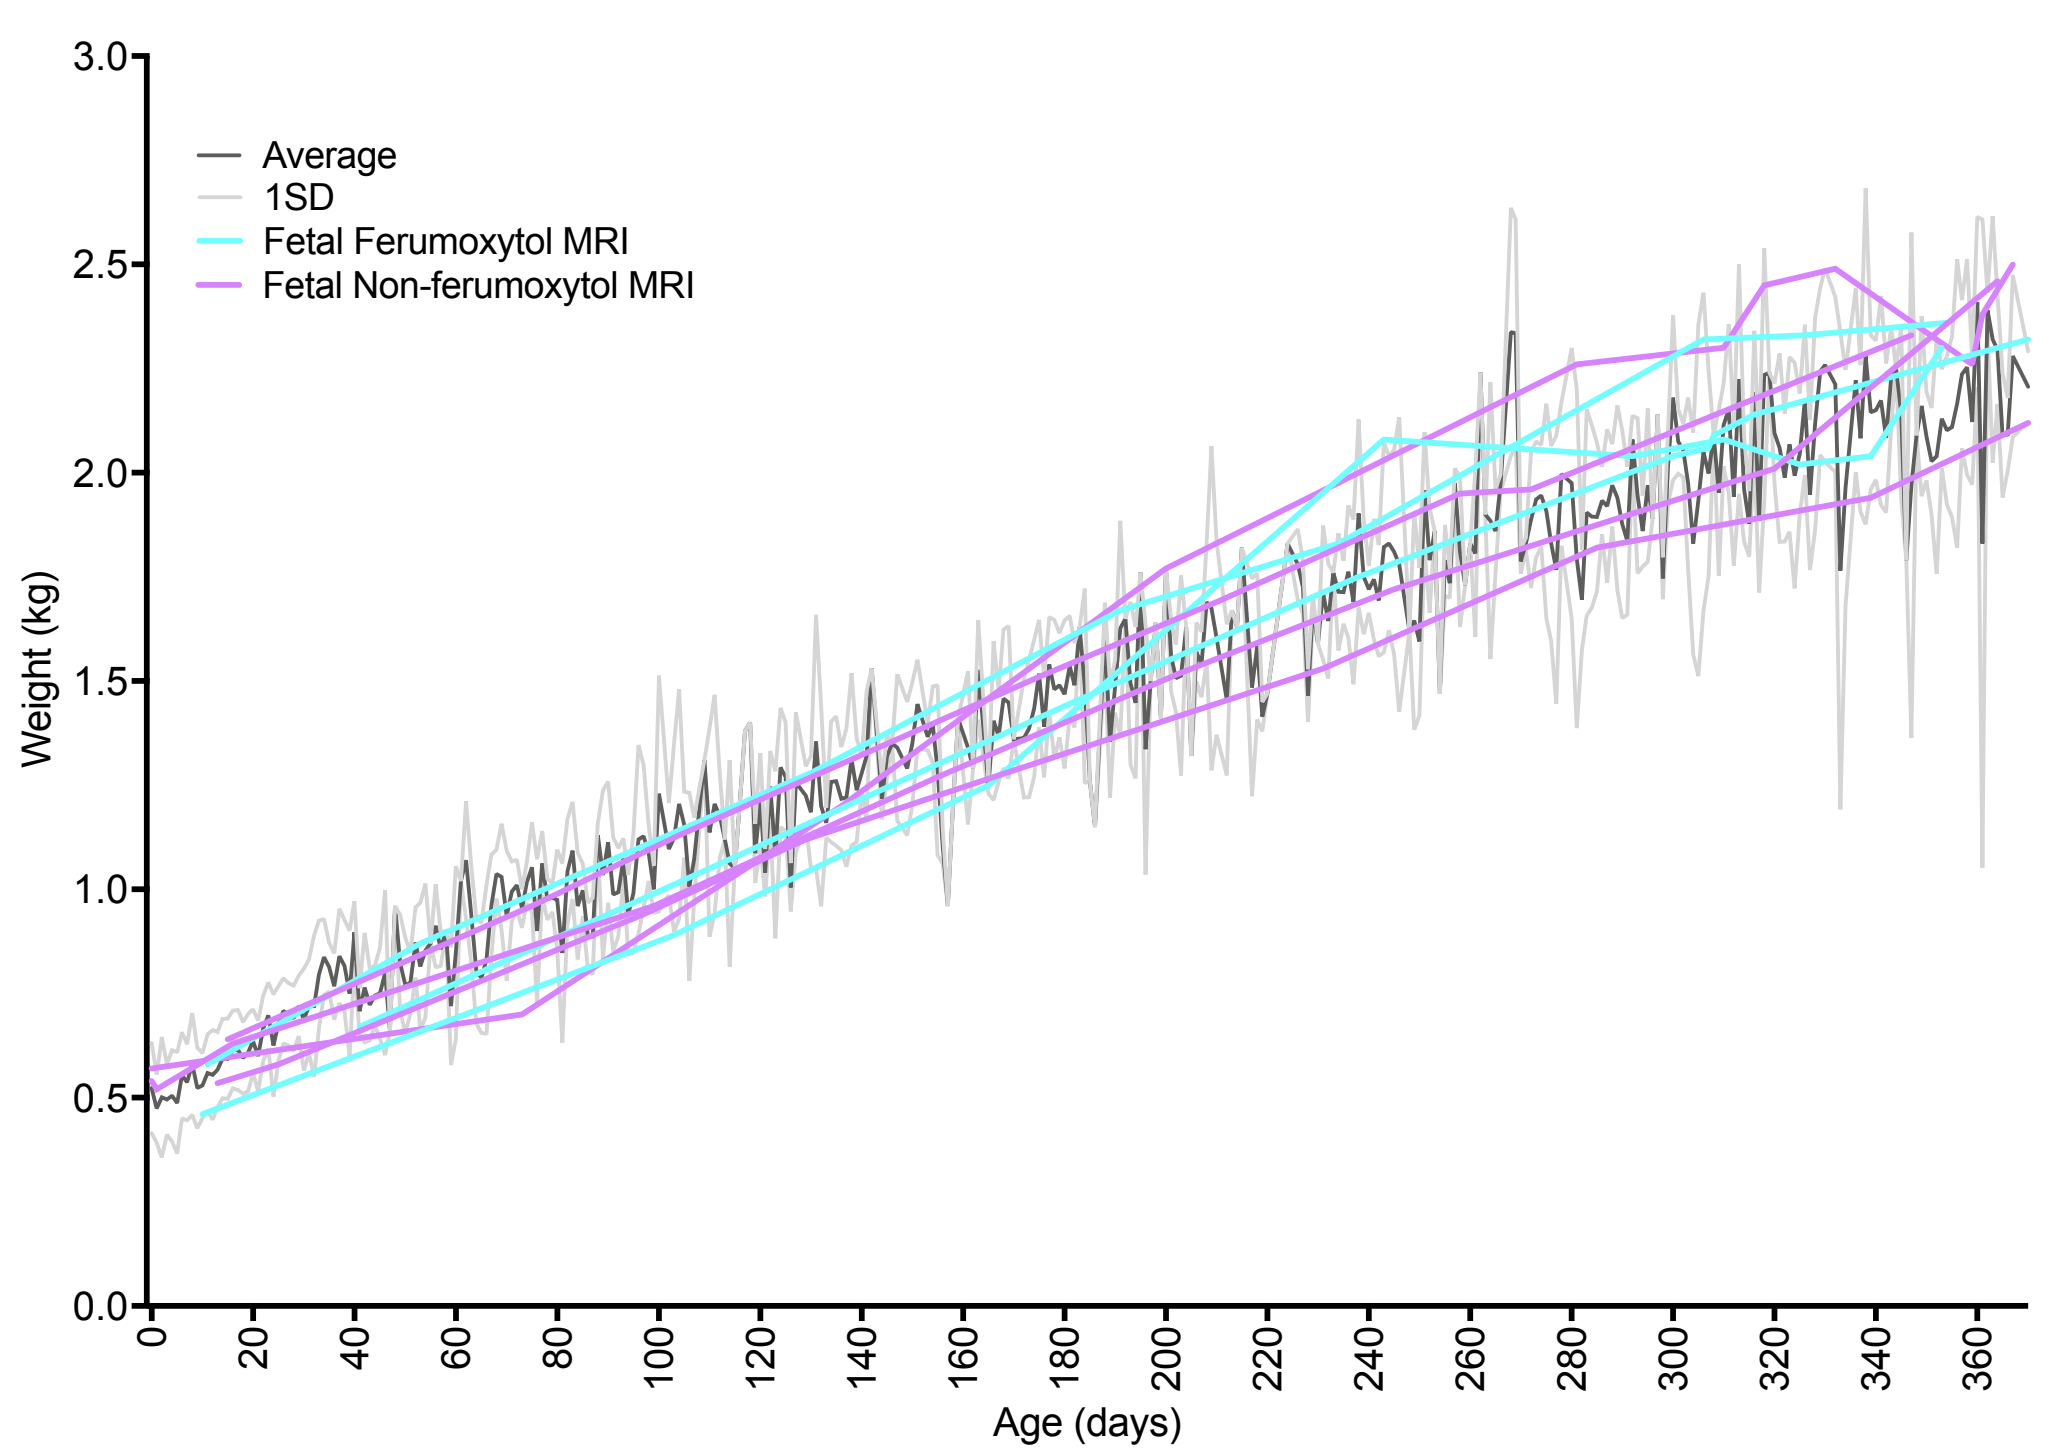

### Animal 1

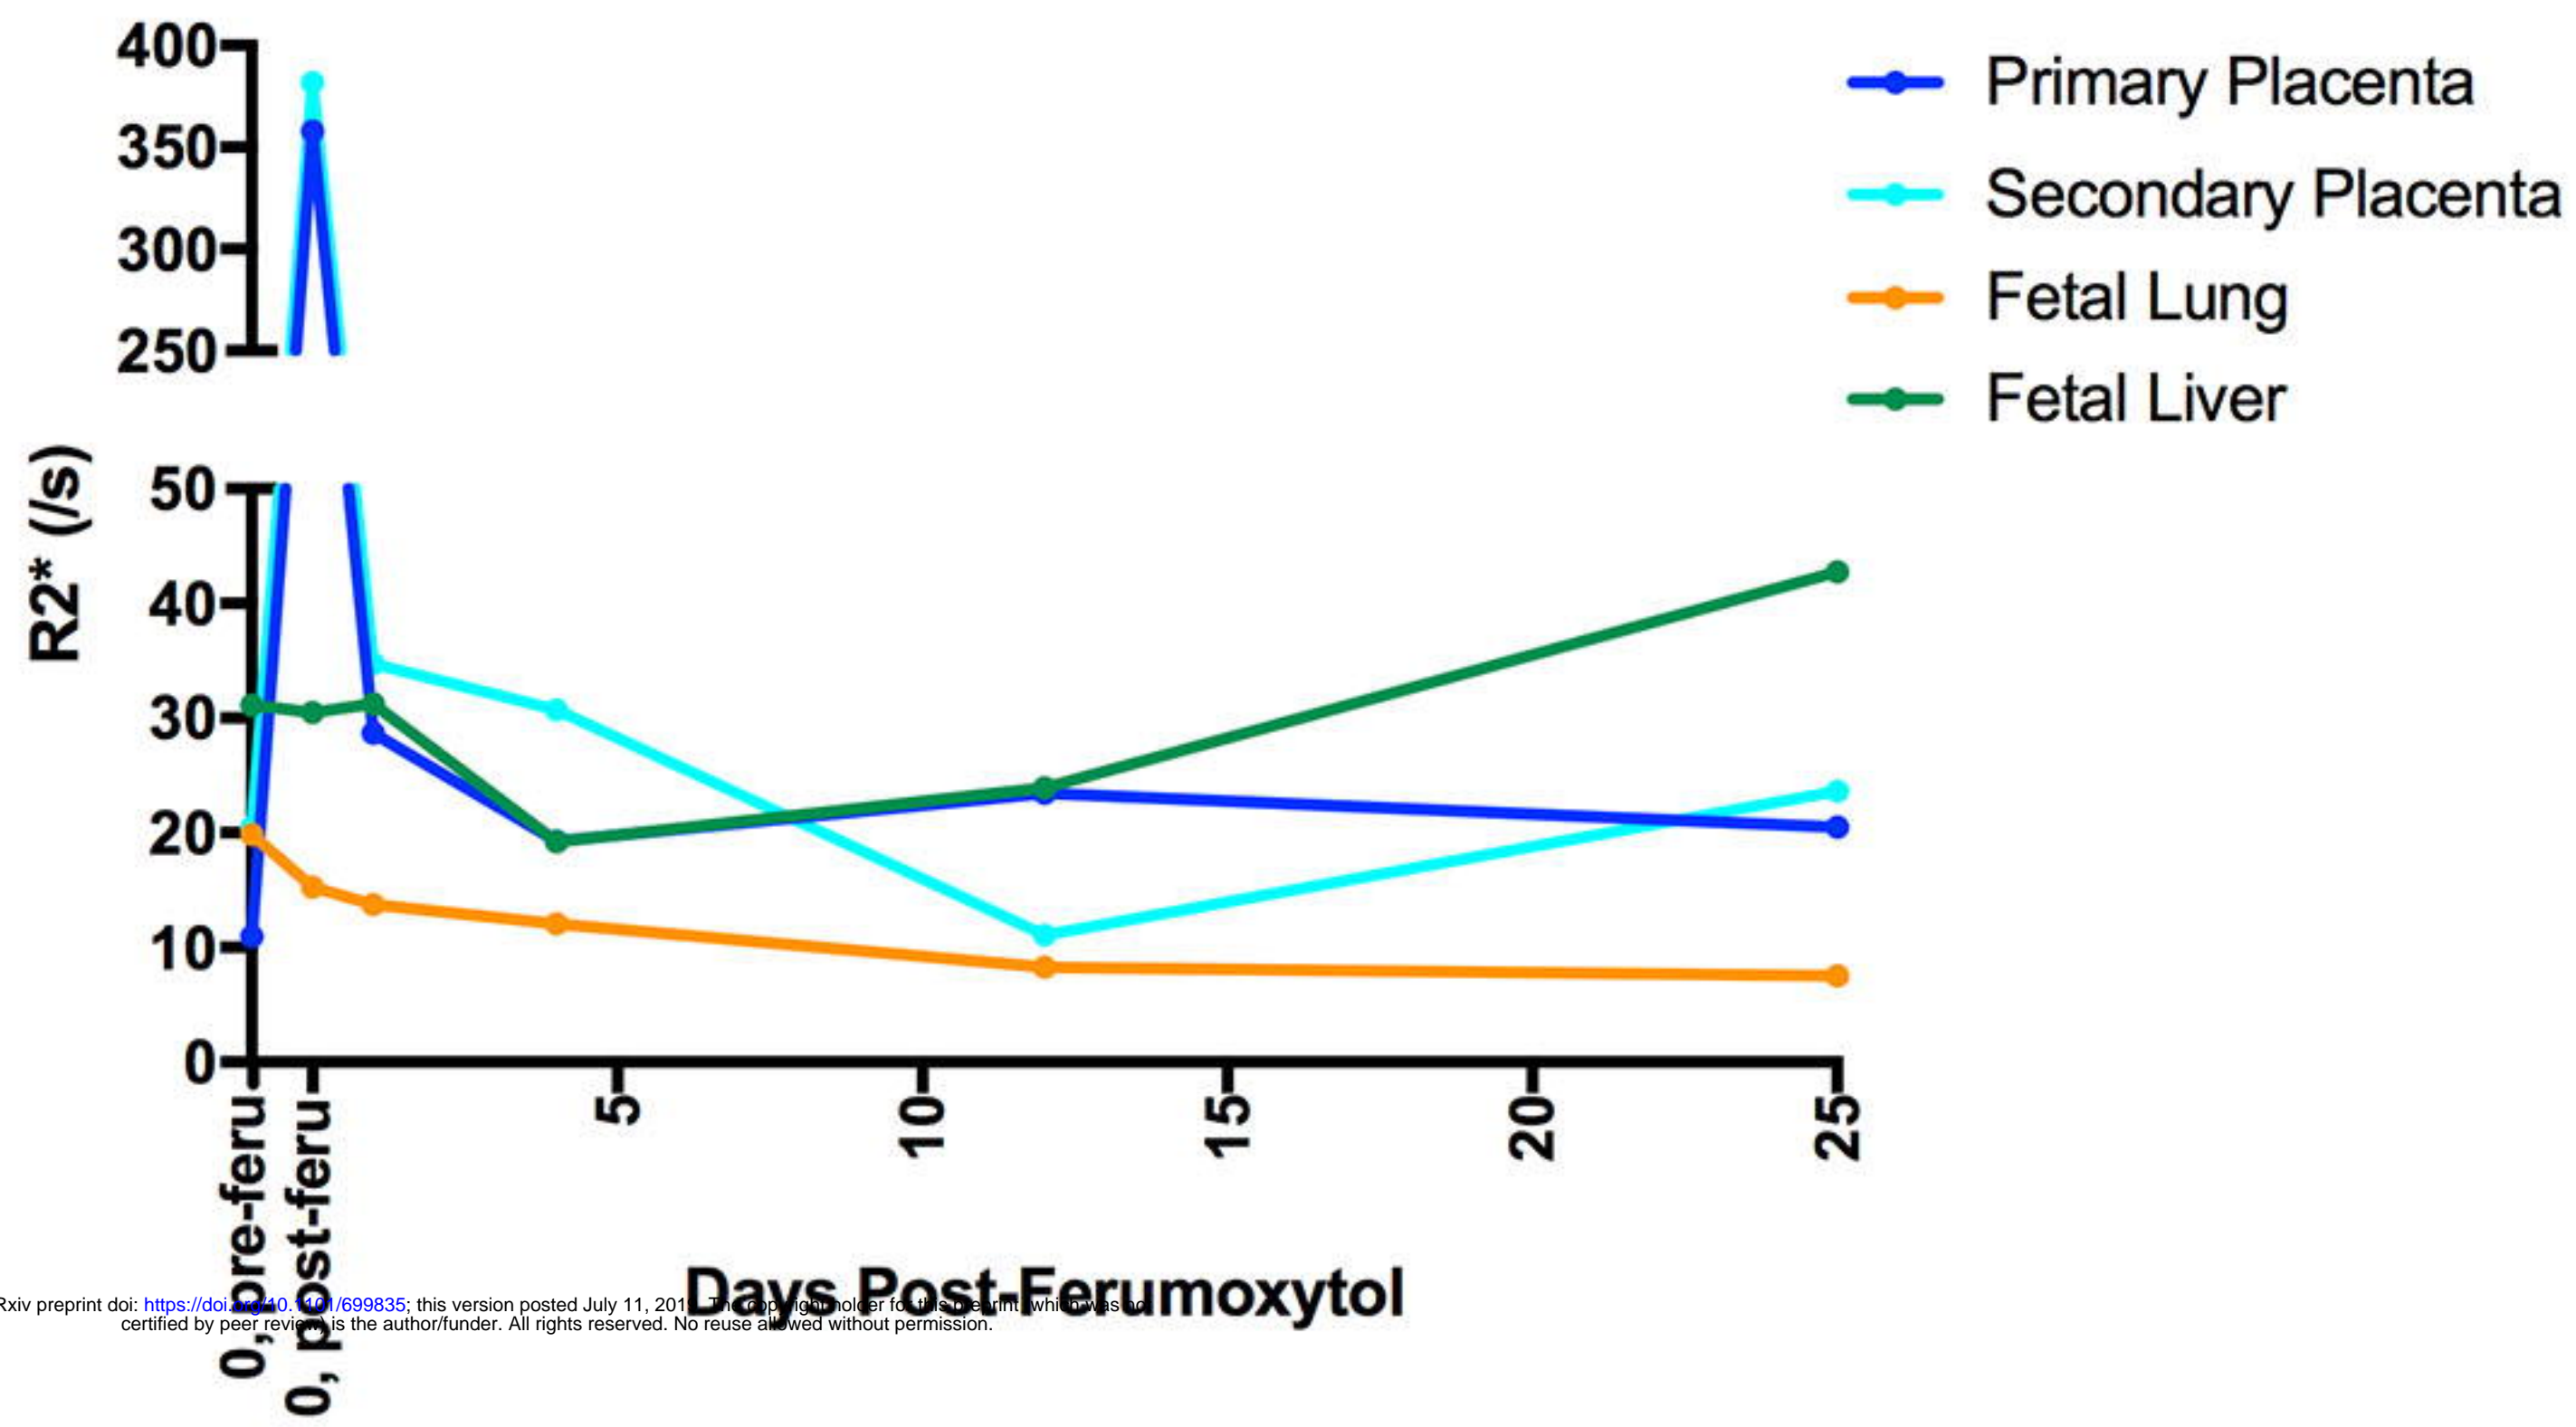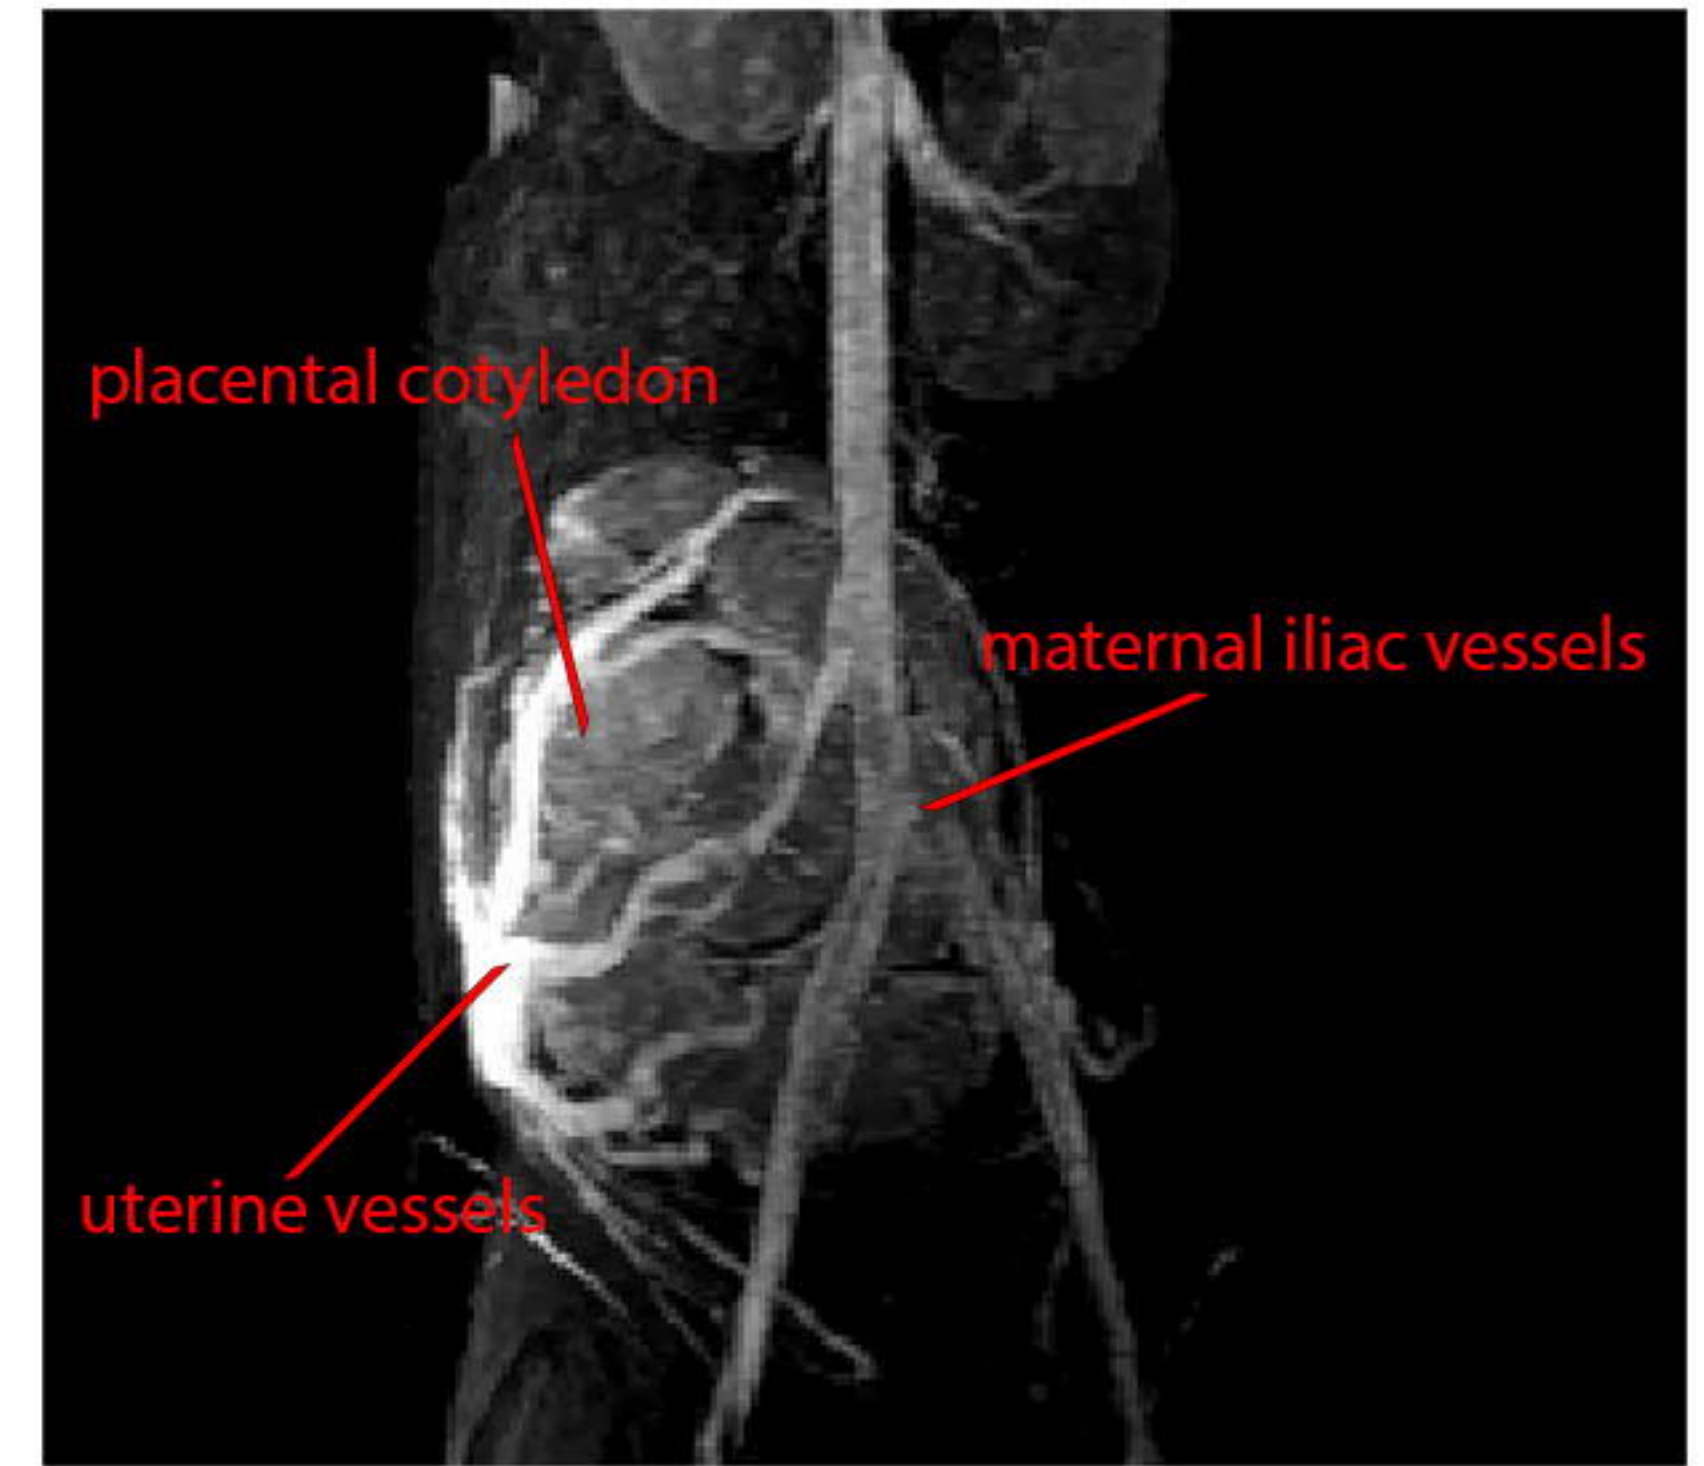

### Animal 2

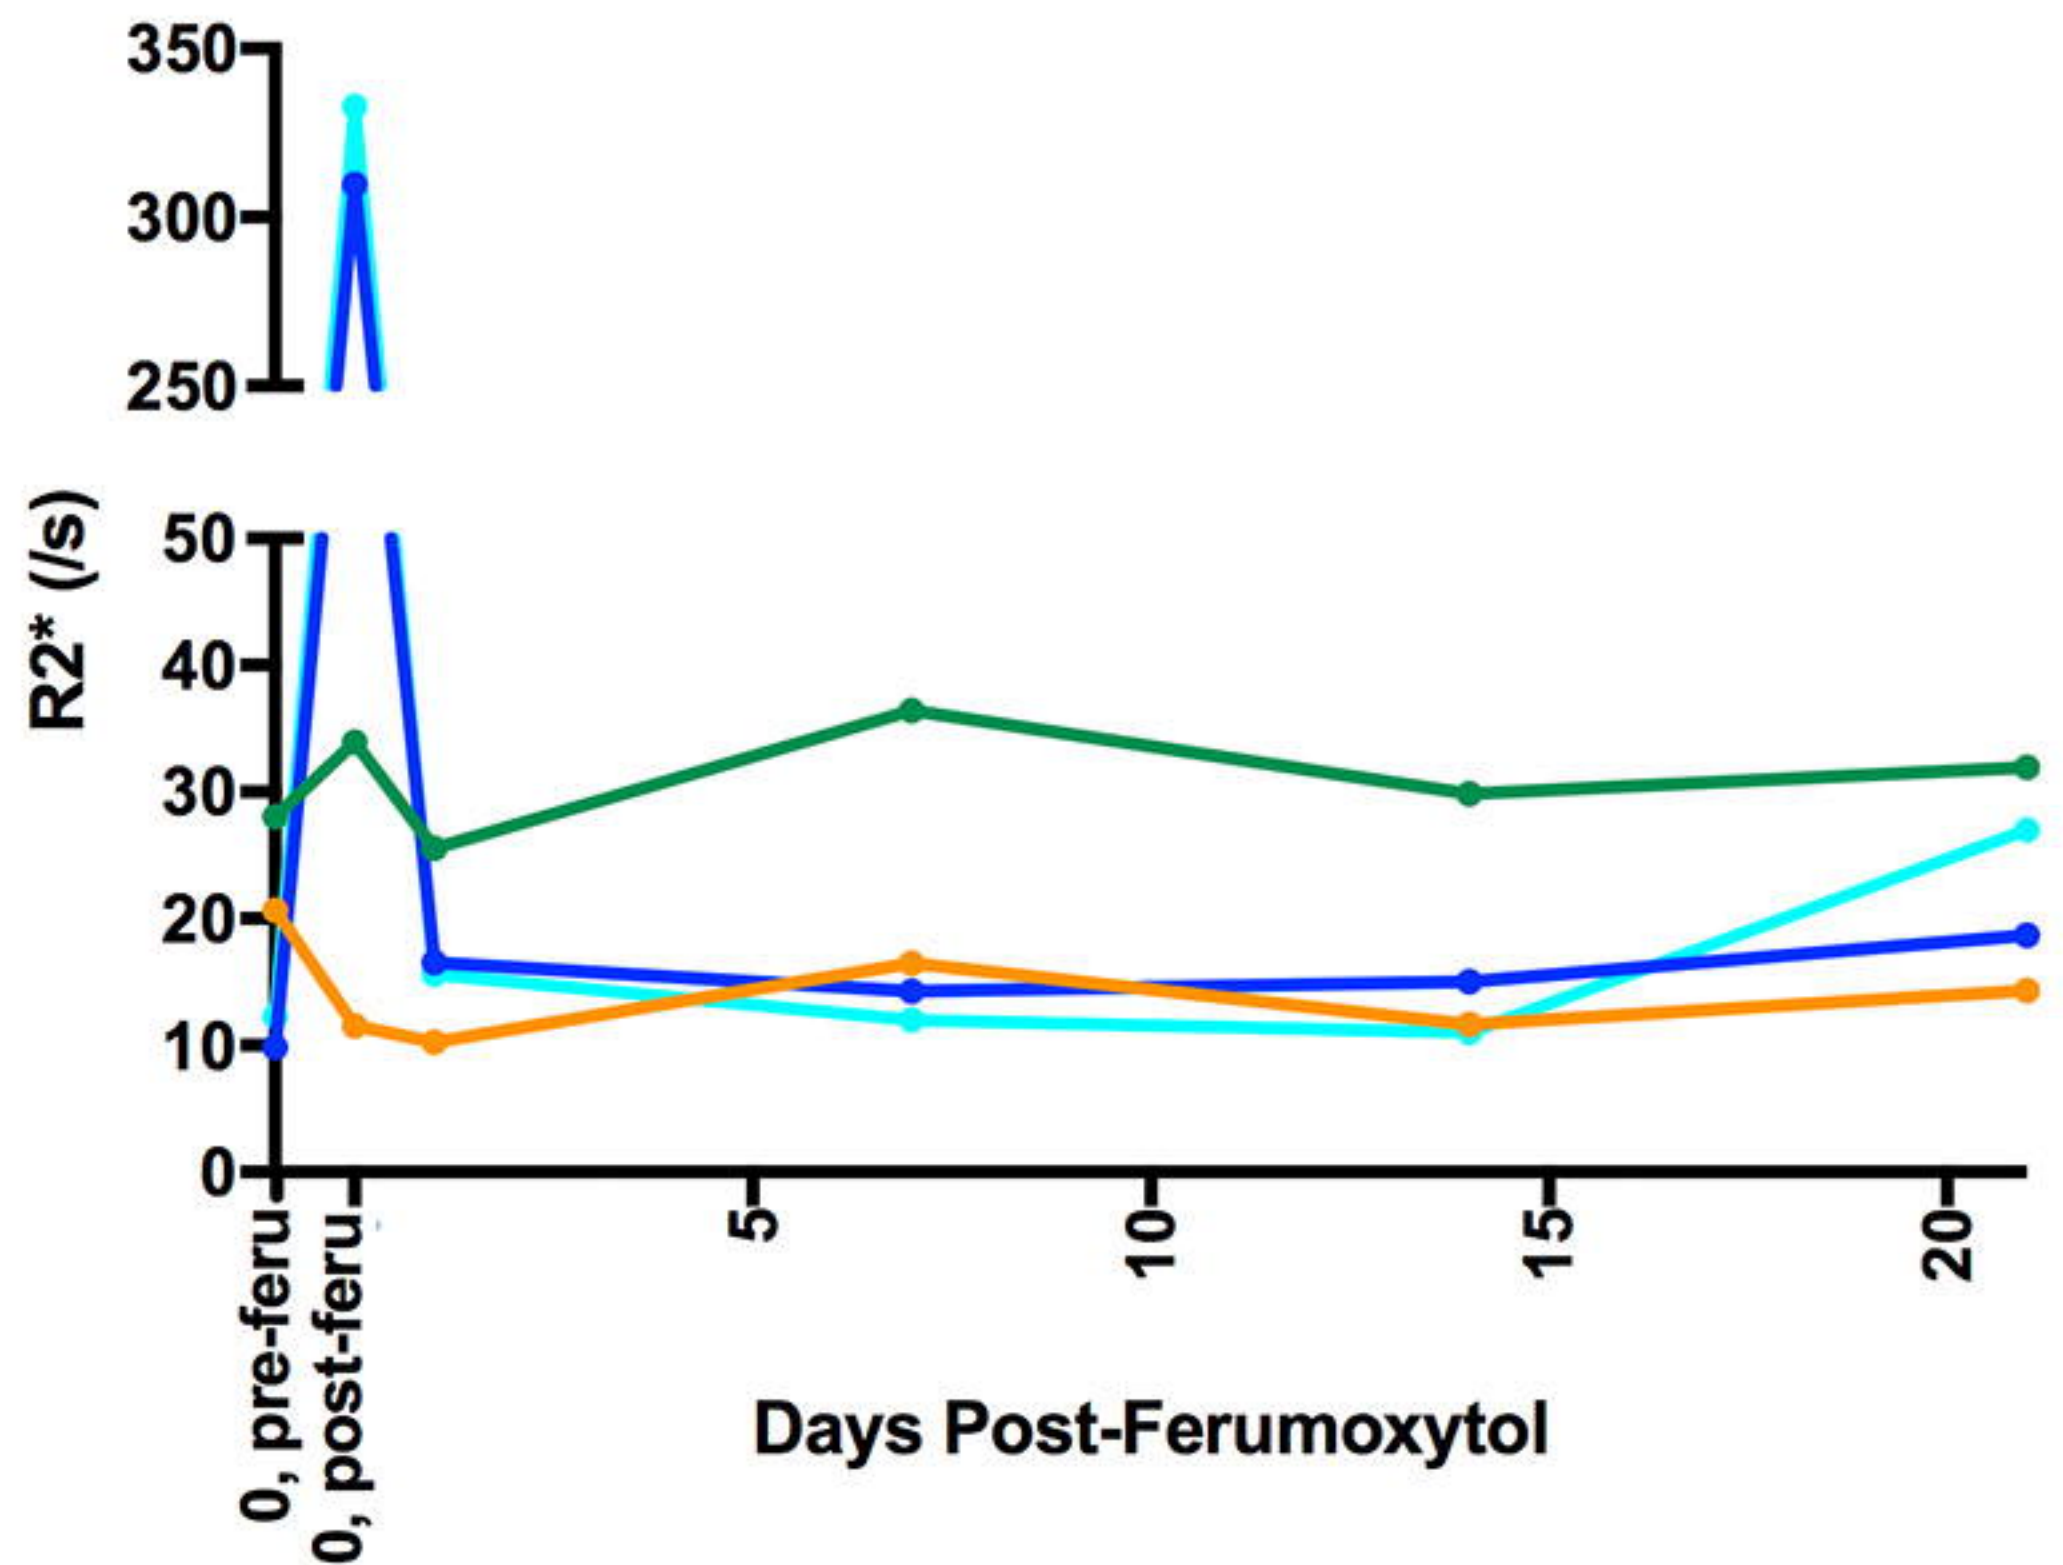

### Animal 3

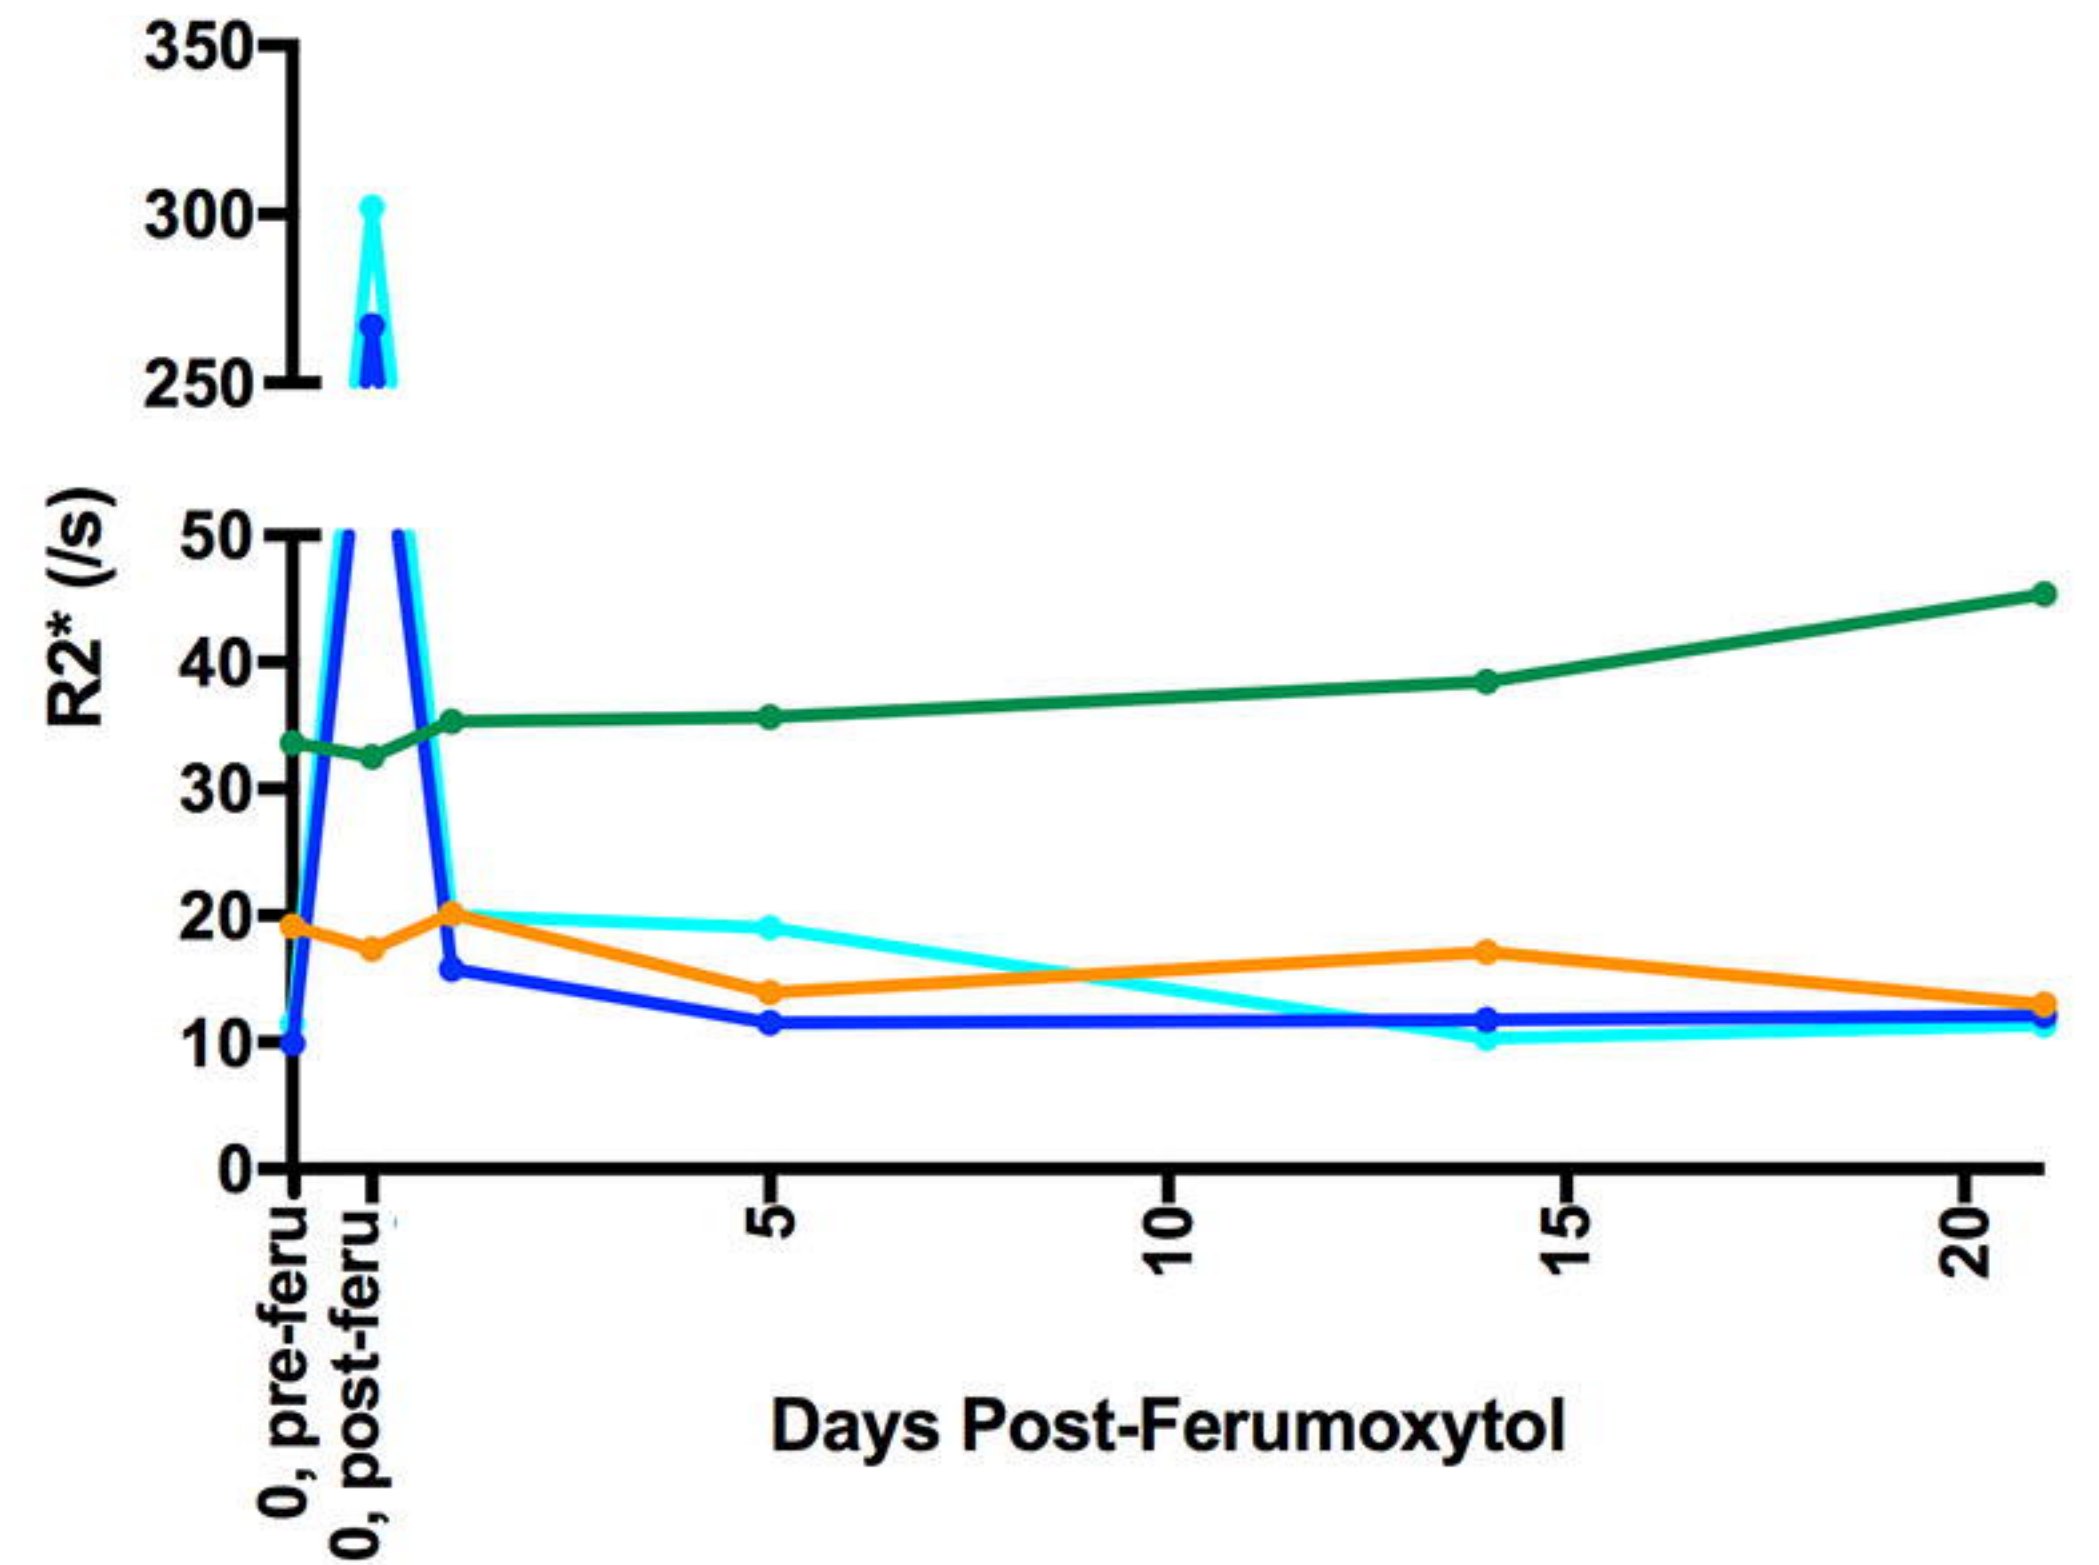

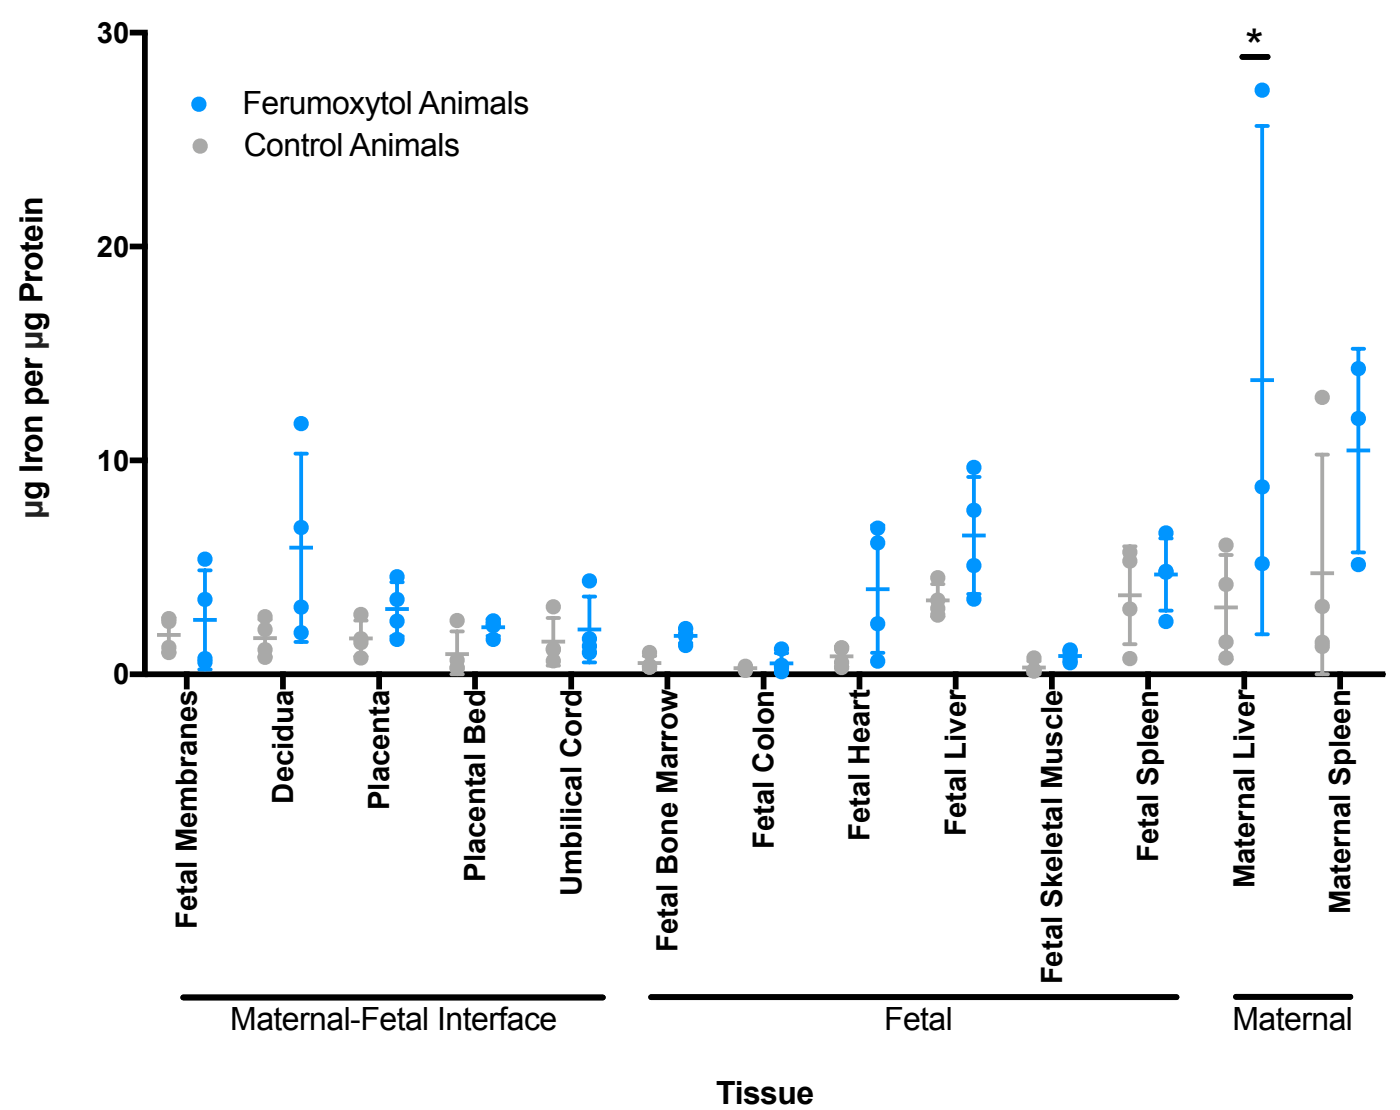



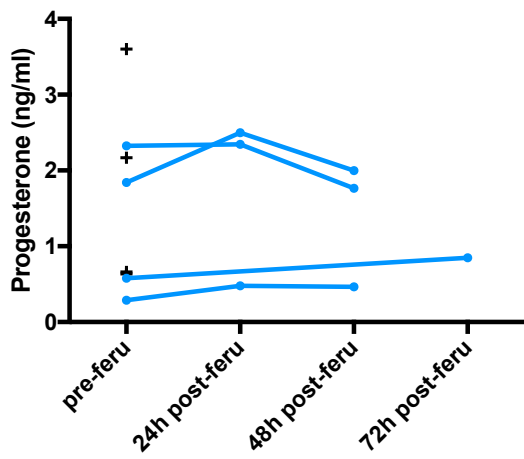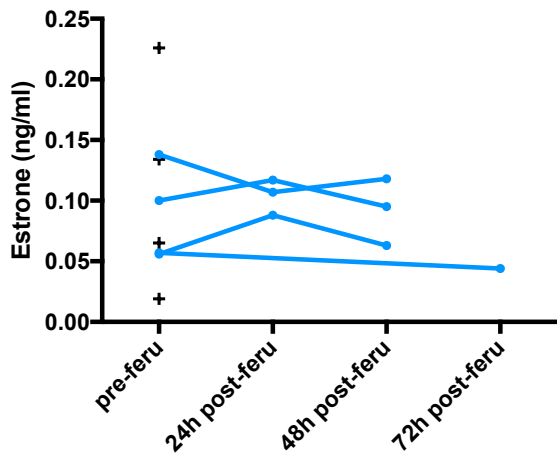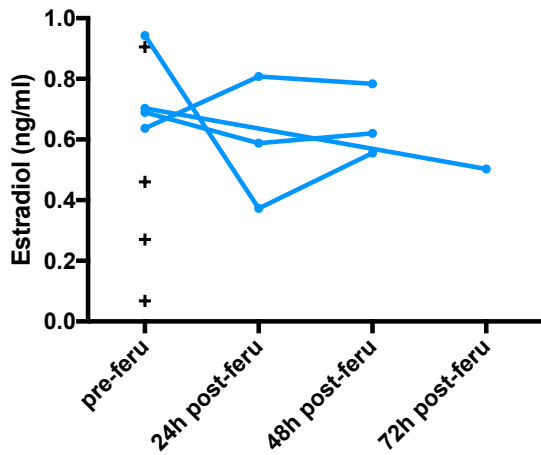



Ferumoxytol

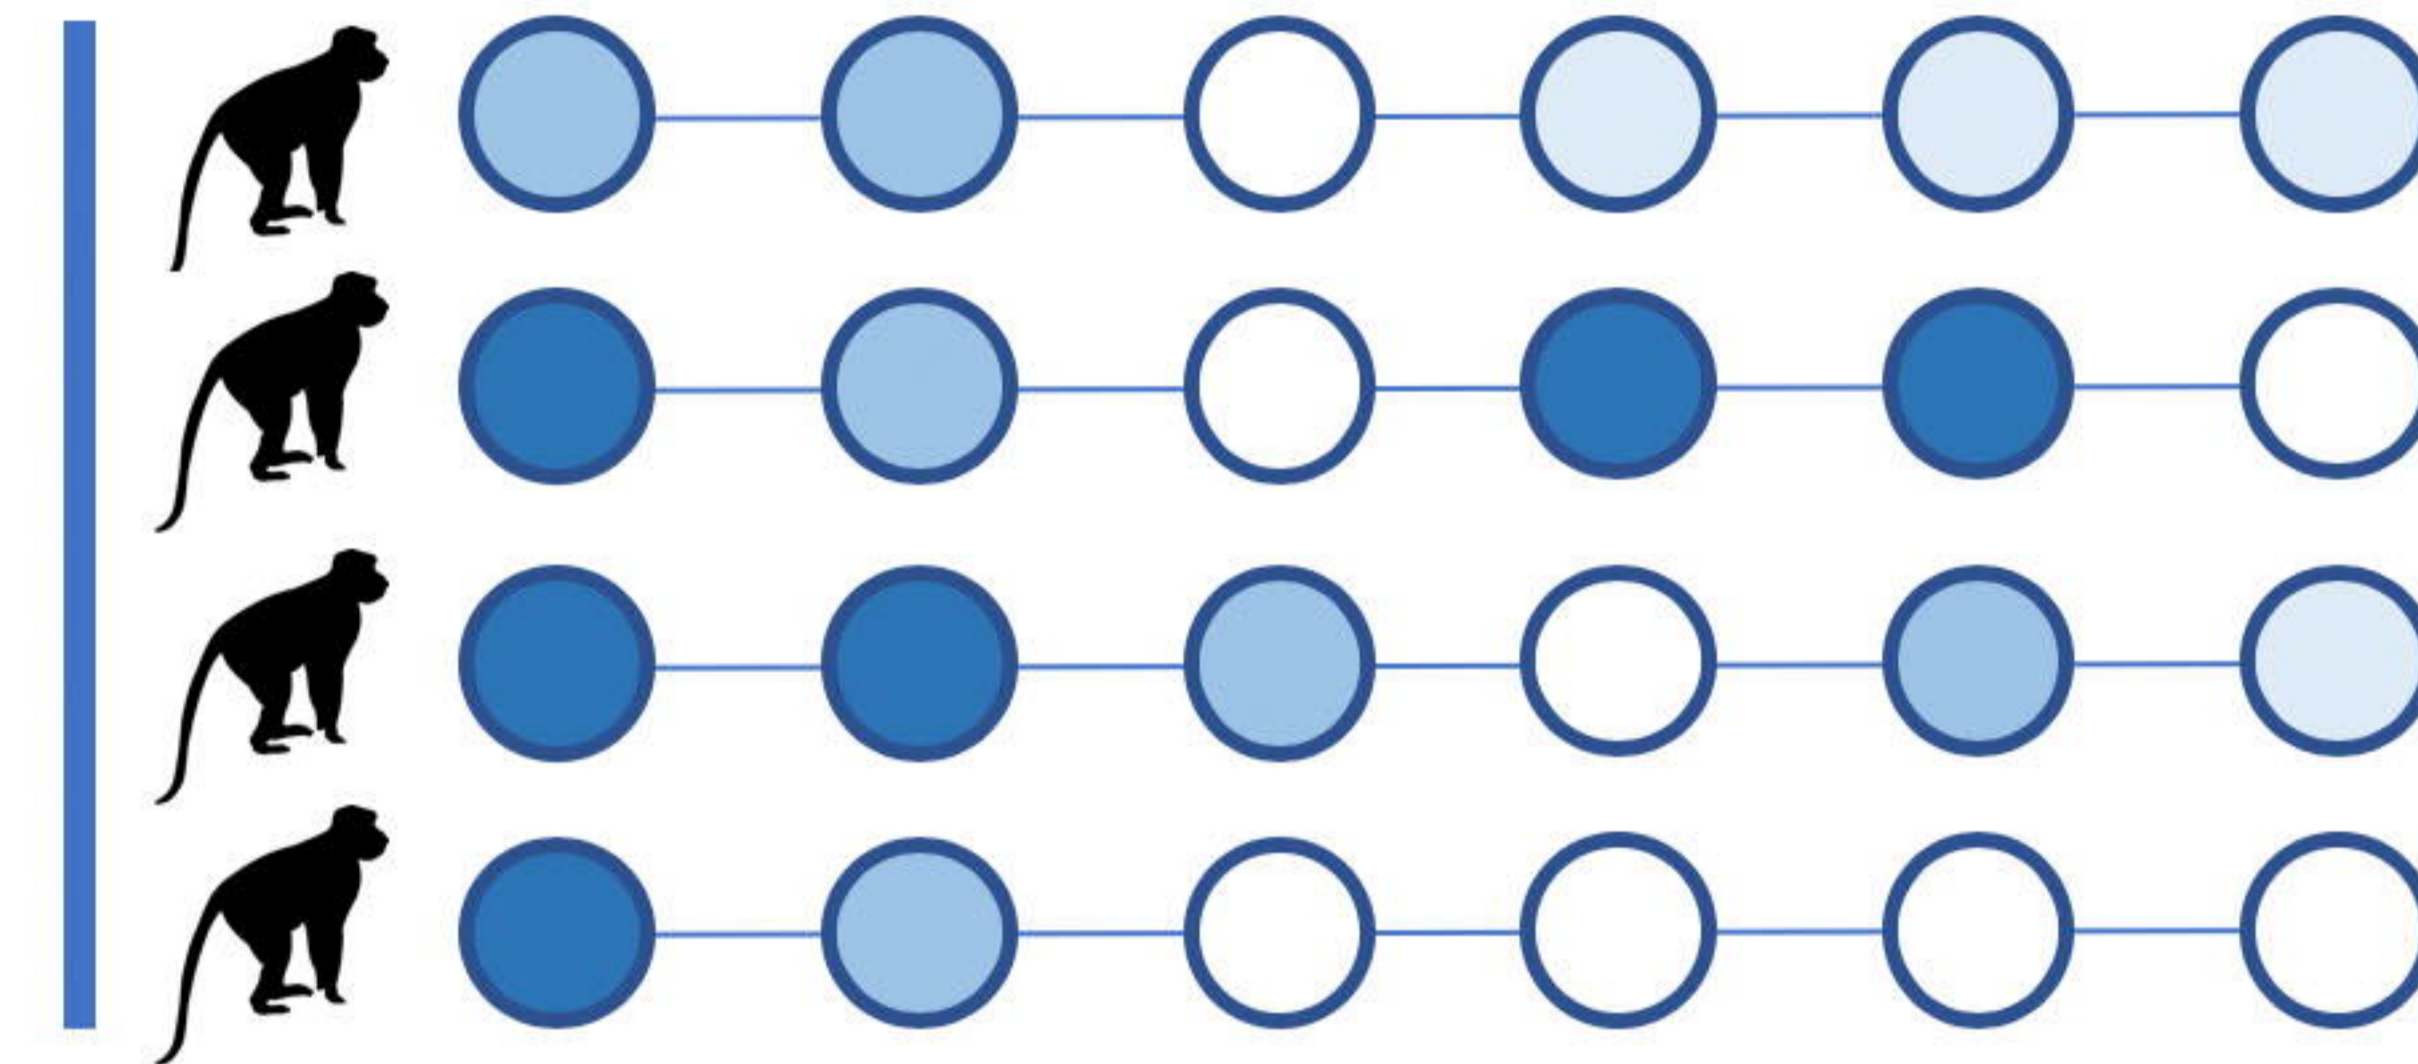

Control

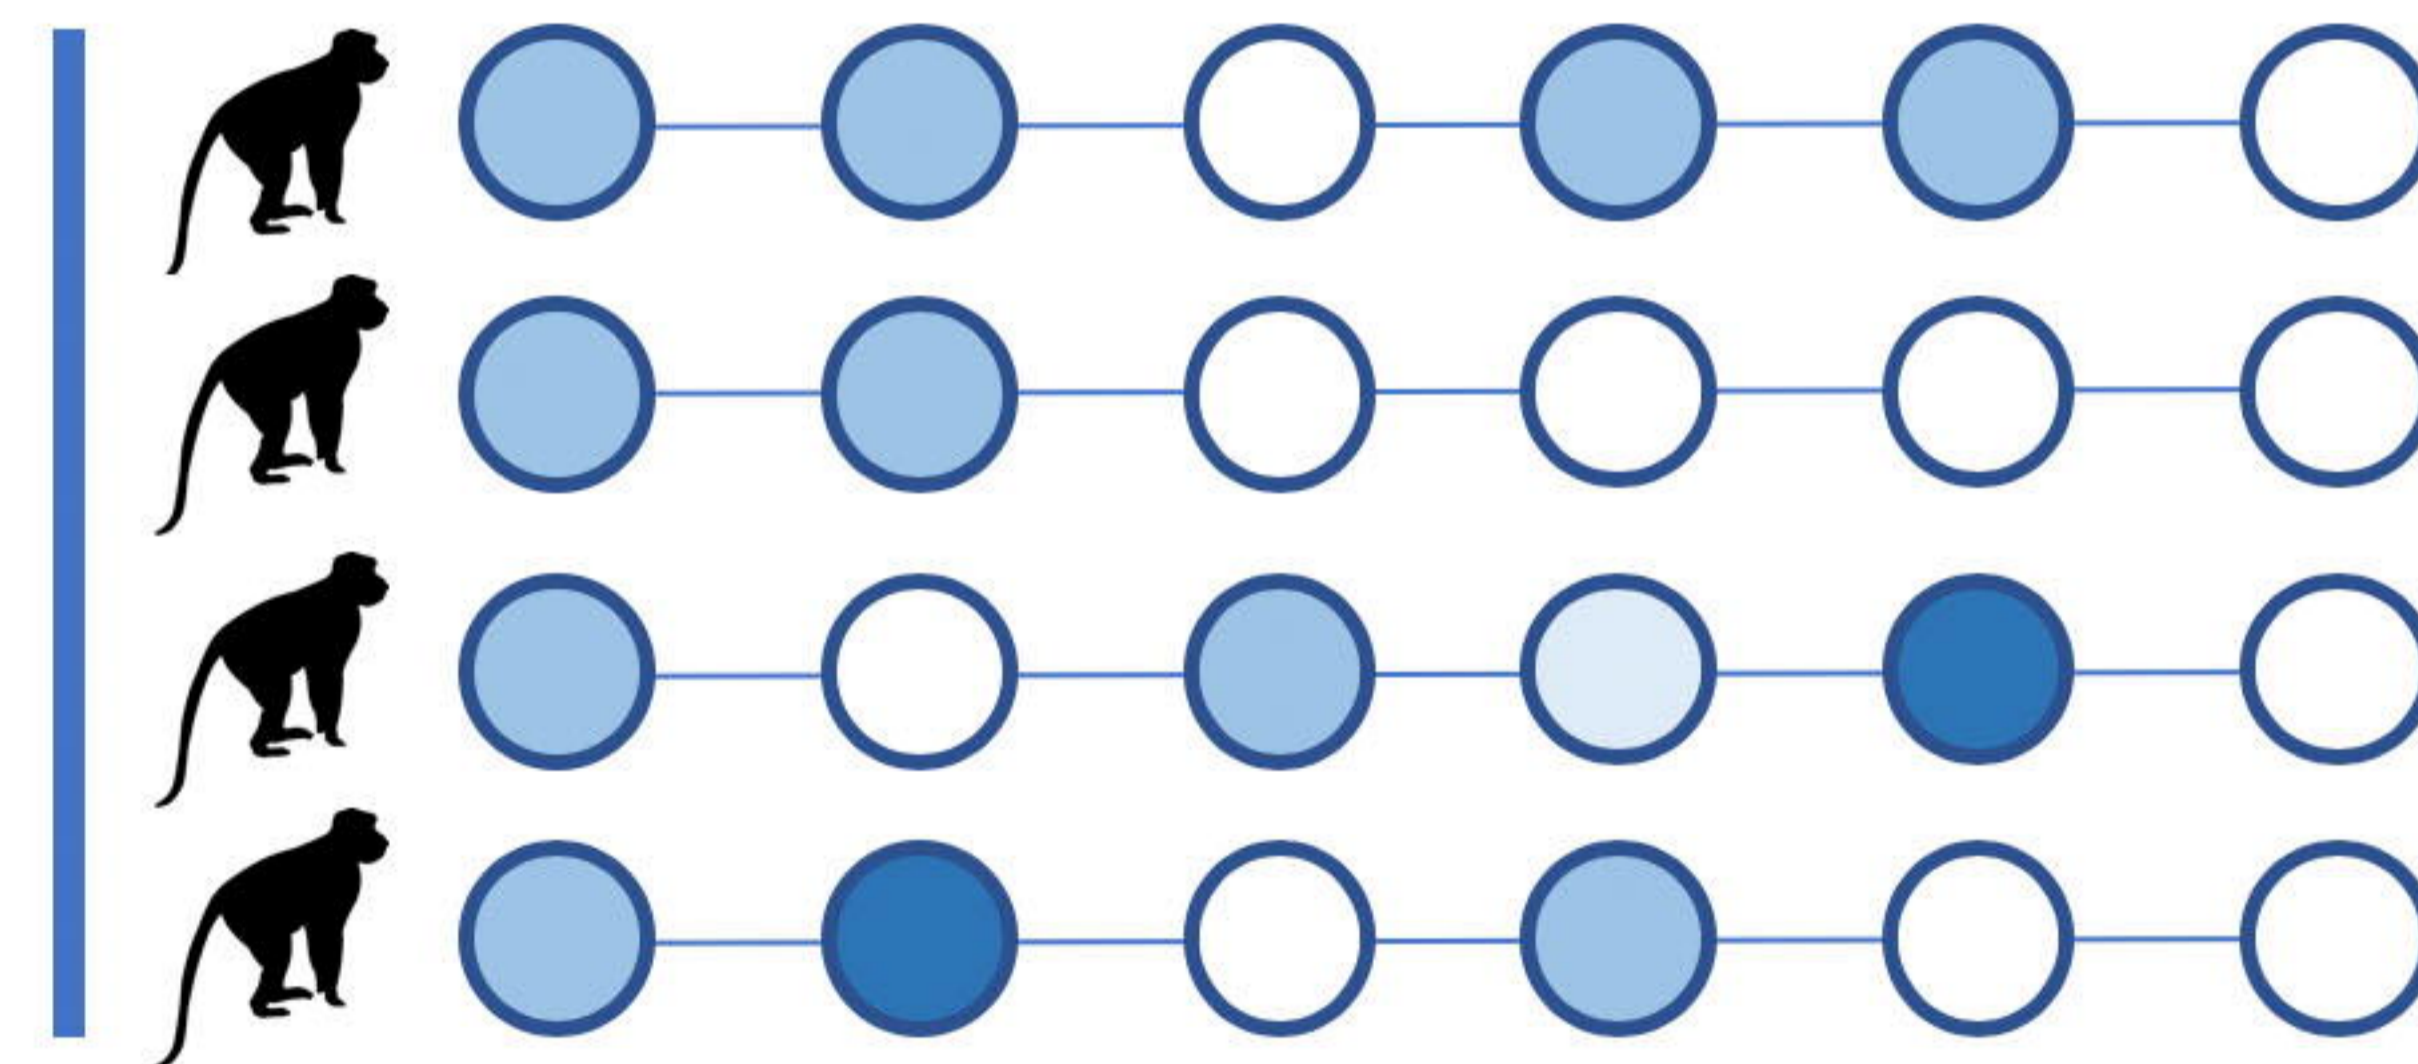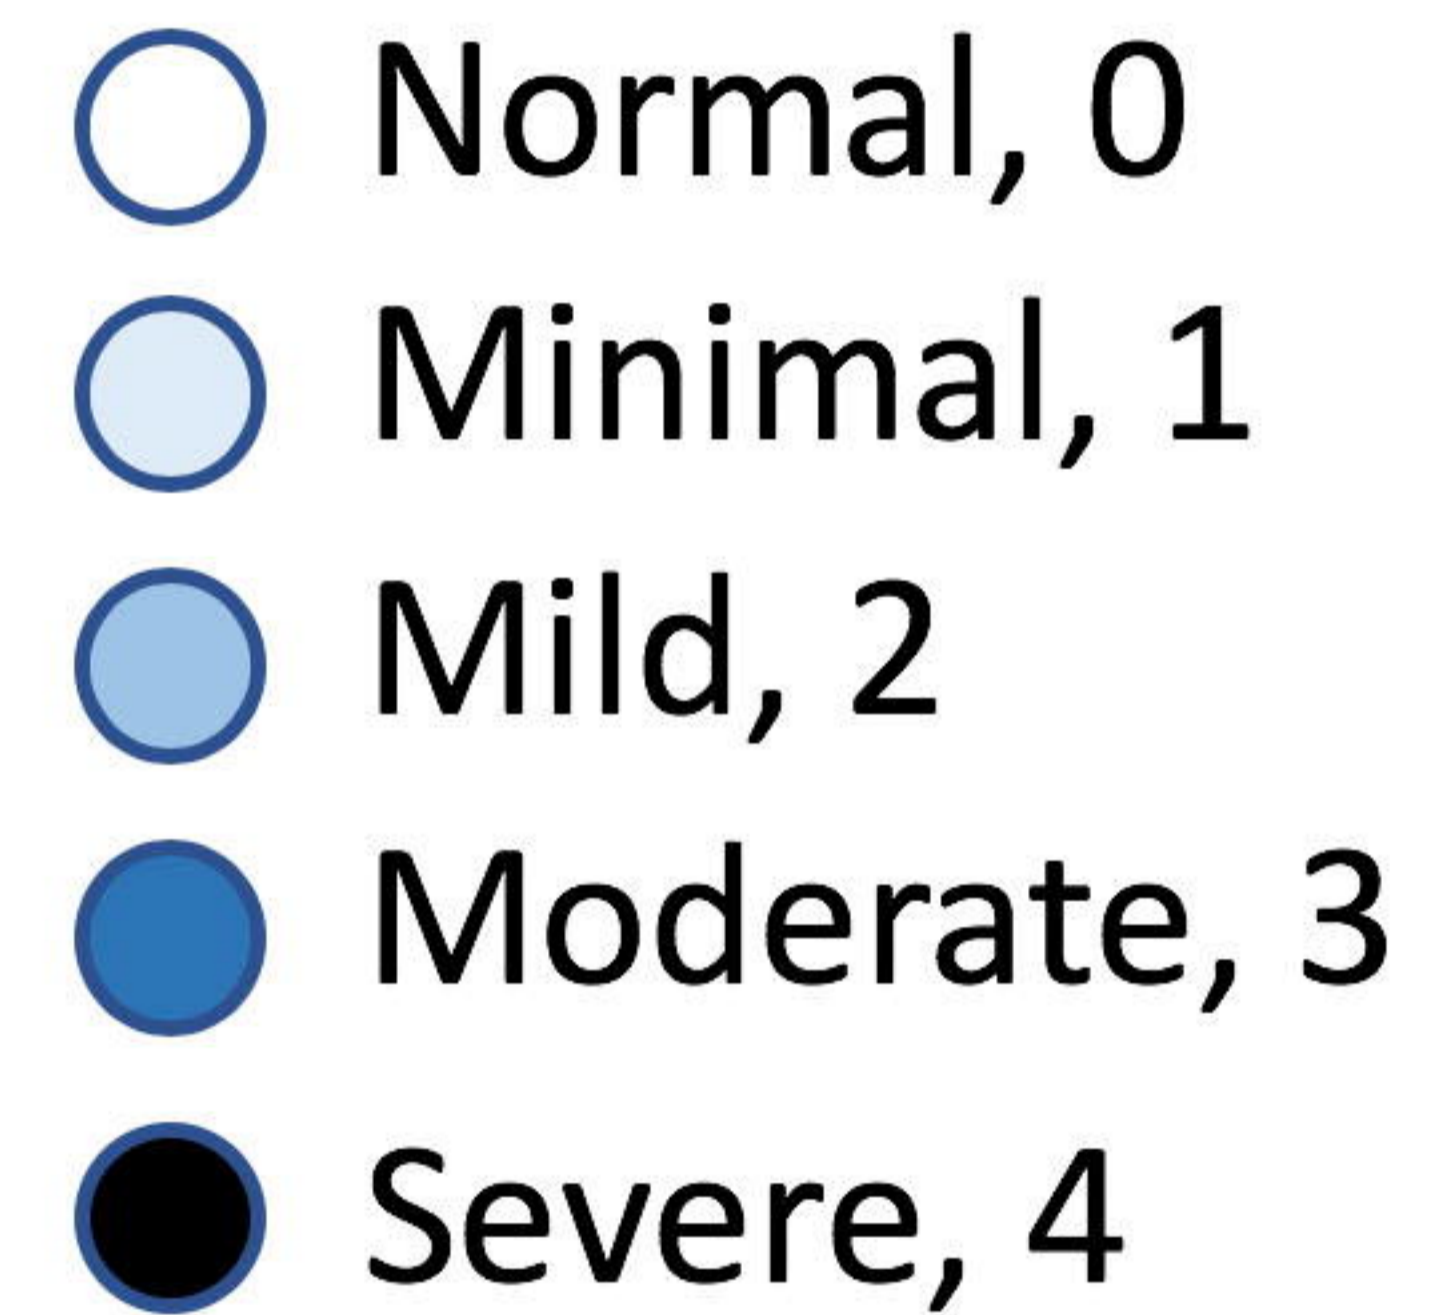

Average Pathology Scores with Standard Error

|                    | Placenta  | Decidua   | Fetal Membranes | Placental Bed | Maternal Spleen | Maternal Liver |
|--------------------|-----------|-----------|-----------------|---------------|-----------------|----------------|
| <b>Ferumoxytol</b> | 2.75±0.25 | 2.25±0.25 | 0.5±0.5         | 1±0.71        | 1.5±0.65        | 0.5±0.29       |
| <b>Control</b>     | 2±0       | 1.75±0.63 | 0.5±0.5         | 1.25±0.48     | 1.25±0.75       | 0±0            |
